# Supplementary material for: DEBATE-statistical analysis plans for observational studies
Source: Springer Nature journal article supplement (doi:10.1186/s12874-019-0879-5), 2019-12-01
Supplement: MOESM2 [file 17486762]

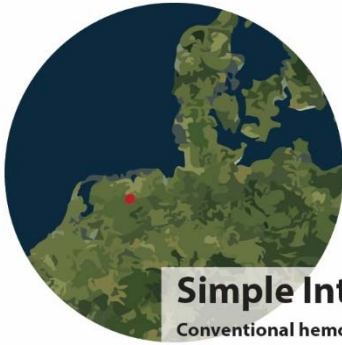

## Simple Intensive Care Studies

Conventional hemodynamic variables  
for estimating cardiac output (SICS I)

### STUDY PROTOCOL

A prospective observational study on the value of conventional hemodynamic parameters in estimating cardiac output and predicting mortality in critically ill patients. Simple Intensive Care Studies I (SICS-I).

Protocol version 2.0, November 8<sup>th</sup> 2016

Short title: conventional hemodynamic parameters for estimating cardiac output

Acronym: SICS-I

Study coordinators:

Ruben Eck, M.D.

Bart Hiemstra, M.D.

Principal Investigator:

Iwan C.C. van der Horst

Department of Critical Care

University Medical Center Groningen

Hanzeplein 1, 9700 RB Groningen, The Netherlands

Groningen University, Groningen, The Netherlands

r.j.eck@umcg.nl

b.hiemstra01@umcg.nl

## Table of content

|                                                              |    |
|--------------------------------------------------------------|----|
| [1-5] Administrative information .....                       | 4  |
| 1 Title .....                                                | 4  |
| 2 Trial registration .....                                   | 4  |
| 3 Protocol version.....                                      | 4  |
| 4 Funding .....                                              | 4  |
| 5 Roles and responsibilities .....                           | 4  |
| a) Contributorship .....                                     | 4  |
| b) Sponsor contact information.....                          | 5  |
| c) Sponsor and funder .....                                  | 5  |
| [6-8] Introduction .....                                     | 6  |
| 6 Background and rationale .....                             | 6  |
| 7 Purpose and objectives .....                               | 7  |
| 8 Design .....                                               | 7  |
| [9-14] Methods: Participants, interventions, outcomes .....  | 8  |
| 9 Study setting.....                                         | 8  |
| 10 Eligibility criteria .....                                | 8  |
| 11 Outcomes .....                                            | 8  |
| 12 Basic study line and add-ons .....                        | 9  |
| 13 Participant timeline .....                                | 10 |
| 14 Sample size .....                                         | 10 |
| 15 Recruitment.....                                          | 11 |
| 16 Informed consent .....                                    | 11 |
| [17] Assignment of interventions.....                        | 12 |
| 17 Blinding (masking) .....                                  | 12 |
| [18-20] Methods: Data collection, management, analysis ..... | 13 |
| 18 Data collection methods .....                             | 13 |

|                                                                    |    |
|--------------------------------------------------------------------|----|
| 19 Data management.....                                            | 19 |
| 20 Statistical methods .....                                       | 19 |
| a) Outcomes .....                                                  | 19 |
| b) Additional analyses.....                                        | 20 |
| c) Analysis population and missing data .....                      | 20 |
| d) Subgroup analyses.....                                          | 20 |
| [21] Appendices.....                                               | 21 |
| Appendix 1A: Overview of the add-ons and their starting date ..... | 21 |
| Appendix 1B: Table of add-ons and their starting date .....        | 21 |
| Appendix 2: Flow chart of data collection moments .....            | 22 |
| Appendix 3: Variables.....                                         | 23 |
| Appendix 3: Echocardiography protocol .....                        | 31 |
| Appendix 4: NIRS-protocol .....                                    | 35 |
| Appendix 4: Pulmonary ultrasound.....                              | 36 |
| Appendix 5: Inclusion procedure (Dutch).....                       | 38 |
| [20] References .....                                              | 45 |

## [1-5] Administrative information

### 1 Title

A prospective observational study on the value of conventional hemodynamic parameters in estimating cardiac output and predicting mortality in critically ill patients.

### 2 Trial registration

Not applicable

### 3 Protocol version

|            |                        |
|------------|------------------------|
| 09-12-2014 | Version 1.0 (Original) |
| 18-12-2014 | Version 1.1            |
| 07-01-2015 | Version 1.2            |
| 08-01-2015 | Version 1.3            |
| 09-01-2015 | Version 1.4            |
| 06-02-2015 | Version 1.5            |
| 19-03-2015 | Version 1.6            |
| 31-03-2015 | Version 1.7            |
| 15-04-2015 | Version 1.8            |
| 08-11-2016 | Version 2.0            |

### 4 Funding

There will be no funding from third parties.

### 5 Roles and responsibilities

#### a) Contributorship

B. Hiemstra (study coordinator)  
 University of Groningen,  
 Department of Critical Care, University Medical Center Groningen  
 Tel: +31-6-16069231  
 Email: [b.hiemstra01@umcg.nl](mailto:b.hiemstra01@umcg.nl)

R.J. Eck (study coordinator)  
University of Groningen,  
Department of Critical Care, University Medical Center Groningen  
Tel: +31-6-42514894  
Email: [r.j.eck@umcg.nl](mailto:r.j.eck@umcg.nl)

I.C.C. van der Horst (PI),  
University of Groningen,  
Department of Critical Care, University Medical Center Groningen  
Tel: +31-50-3610147 / +31-6-14698780  
Email: [i.c.c.van.der.horst@umcg.nl](mailto:i.c.c.van.der.horst@umcg.nl)

F. Keus,  
University of Groningen,  
Department of Critical Care, University Medical Center Groningen  
Tel: +31-50-3610147 / +31-6-52724683  
Email: [f.keus@umcg.nl](mailto:f.keus@umcg.nl)

All authors contributed to the study protocol and approved the final protocol.

**b) Sponsor contact information**

University Medical Center Groningen  
Hanzeplein 1, 9700 RB Groningen, Nederland  
General phone number: +31 50 361 6161

**c) Sponsor and funder**

Not applicable

## **[6-8] Introduction**

### **6 Background and rationale**

Circulatory shock is a condition of generalized inadequate blood flow through the body, leading to insufficient tissue perfusion and inadequate delivery of oxygen and other nutrients, to the extent that tissues are damaged (1). We can distinguish four basic mechanisms of circulatory failure, caused by a scale of underlying illnesses: distributive, hypovolemic, obstructive and cardiogenic shock. The last three types are characterized by a low cardiac output and hypovolemia. Distributive shock is characterized by peripheral circulation failure, with a low systemic vascular resistance, a disturbed microcirculation and a high cardiac output. Frequently, these forms overlap (2).

Shock is a common problem in the intensive care unit (ICU) as it affects about one third of the patients (3). Septic shock appears to be the most common type, followed by cardiogenic and hypovolemic shock. The diagnosis of shock is based on clinical examination with use of well-known circulatory parameters such as blood pressure and heart rate; biochemical parameters such as lactate and direct (semi-)invasive measurement of cardiac output and other variables (2).

Since cardiac output is an important determinant of oxygen delivery, many different methods of measuring cardiac output have been suggested. These methods range from non-invasive to invasive measurements with central lining. The most invasive method, the pulmonary artery catheter (PAC) has long been considered the optimal form of monitoring cardiac output by using thermodilution. However, this technique is associated with adverse events, such as bleeding, and there is no clear evidence of improved outcome (4). Therefore, numerous other techniques have been proposed, ranging from systems that use the dilution technique but only require central venous and peripheral artery lines; to less invasive tools that estimate cardiac output based on the arterial pressure waveform; and to non-invasive echocardiography (5-7).

Despite technical advances, much remains unknown about the value of conventionally used hemodynamic parameters for estimating cardiac output. A distinction between macro- and microcirculatory parameters can be made (8,9). Commonly used macro-circulatory parameters are heart rate, systolic and diastolic blood pressure, mean arterial pressure and central venous pressure. Lactate is used as a proxy for microcirculatory status. Over the years several other measurements have been suggested to improve insight in the hemodynamics of a certain patient or a group of patients. Skin temperature, capillary refill, mottling score and urinary output are used for

hemodynamic assessment of the peripheral circulation and tissue perfusion (10-15). Most of these parameters have not been evaluated in a large prospective study and especially a combination of all these parameters has not directly been correlated to cardiac output.

More knowledge on the predictive value of all hemodynamic parameters in estimating cardiac output could assist physicians in earlier detection of impaired hemodynamics without the need for invasive or advanced methods. In this study we aim to evaluate all hemodynamic parameters in a large unselected population of critically ill patients and to correlate them to cardiac output.

### **7 Purpose and objectives**

The purpose of this study is to create an infrastructure for a registry flexible to incorporate temporarily added specific research questions on the outcome of critically ill patients.

- The primary objective is the association between cardiac output (measured by transthoracic echocardiography) and hemodynamic parameters, such as heart rate, systolic blood pressure, diastolic blood pressure, mean arterial pressure, central venous pressure, skin temperature (and gradients), capillary refill time, mottling score, etc.
- The secondary objective is the association between hemodynamic parameters and 7 day, 30 day, and 90 day mortality.

### **8 Design**

This study has a single-centre prospective observational design.

## **[9-14] Methods: Participants, interventions, outcomes**

### **9 Study setting**

The study will be conducted in the adult Intensive Care of the University Medical Center Groningen, a tertiary teaching hospital in the Northern part of the Netherlands. The UMCG has 4 ICU's to which all types of patients are admitted, however each ICU has their own interest: surgical, cardiothoracic, internal, and neurological. We unrolled our study at the surgical ICU ("ICV 4") only to detect start-up problems and assess the feasibility and burden of our research on patients. We included our first patient at March 2015. From May 2015 we started including all acutely admitted patients at the internal ICU ("ICV 3"). Acutely admitted patients at the cardiothoracic ("ICV 2") and neurologic ICU ("ICV 1") were added to our registry from February 2016 and March 2016, respectively.

### **10 Eligibility criteria**

Inclusion criteria:

- Emergency admission
- Expected stay > 24 hours

Exclusion criteria:

- Age < 18 years
- Planned admission either after surgery or for other reasons
- Unable to obtain informed consent, e.g. refusal, suicide attempts due to acute psychiatric 'derailment', mental retardation or a language barrier

### **11 Outcomes**

Primary outcome:

The primary outcome measurement is the association of hemodynamic variables with the cardiac output, measured by transthoracic echocardiography. If cardiac output cannot be estimated using transthoracic echocardiography for any reason whatsoever, then transoesophageal echocardiography can be an alternative method for estimating cardiac output. If transoesophageal echocardiography is considered contraindicated or does not result in an estimate for cardiac output, then that case is included, but the outcome is considered a missing data.

Secondary outcome:



The secondary outcome is the association of hemodynamic variables with mortality at day 7, day 30 and day 90.

## 12 Basic study line and add-ons

We constructed a basic hemodynamic profile of each included patient through a onetime physical examination combined with transthoracic echocardiography (TTE). The continuously running cohort study, i.e., registry, was designed with a basic set including all conventionally hemodynamic parameters. In addition, specific research questions necessitating more technically or advanced measurements could be temporarily incorporated on top of the continuously running set of parameters. This allowed for a flexible design in terms of specific research questions, planning, and efficiency of data collection. If a measurement proved to be feasible, i.e. seemed accurate and could be performed within a few minutes, the measurement was added to our basic research line.

To date, we initiated a total of ten add-ons of which five are currently still ongoing and two are being planned. Appendix 1 provides an illustrative overview of the current and planned add-on research questions.

**Table 1.** Overview of add-on studies

| <b>Sub study #</b>                                    | <b>Research question(s)</b>                                                                                                                                                                                                                                                               |
|-------------------------------------------------------|-------------------------------------------------------------------------------------------------------------------------------------------------------------------------------------------------------------------------------------------------------------------------------------------|
| <b>NIRS</b><br><i>Status: terminated</i>              | What is the association of conventional hemodynamic variables to StO <sub>2</sub> measured by NIRS?<br><br>Do kneecap NIRS-measurements associate better with the variables mentioned above than the standard thenar measurement?                                                         |
| <b>Pulmonary ultrasound</b><br><i>Status: ongoing</i> | What is the association of a B-profile measured with ultrasound and auscultating pulmonary crepitations with the diagnosis of interstitial lung edema by chest radiograph?<br><br>Is there a difference in cardiac output between the group with and without the presence of a B profile? |
| <b>PEEP-challenge</b><br><i>Status: terminated</i>    | Does an increase in PEEP correlate with a decrease in cardiac output?                                                                                                                                                                                                                     |
| <b>RV function</b><br><i>Status: ongoing</i>          | What is the association between RV-function assessed with TAPSE and RV S' of the tricuspid annulus and 90-day mortality?<br><br>What is the association between RV-function and conventional hemodynamic variables obtained from physical examination?                                    |
| <b>Abdominal flow</b>                                 | Is there a correlation between cardiac output and peripheral blood flow?                                                                                                                                                                                                                  |

|                                |                                                                                                                                                                                         |
|--------------------------------|-----------------------------------------------------------------------------------------------------------------------------------------------------------------------------------------|
| <i>Status: terminated</i>      | Can we calculate a proxy for abdominal organ blood flow by subtraction of peripheral flow to head and extremities from the cardiac output?                                              |
| <b>FloTrac</b>                 | What is the level of agreement between cardiac output measured by the FloTrac device compared to cardiac output measured with TTE?                                                      |
| <i>Status: ongoing</i>         | Do the levels of agreement change when factors that might influence FloTrac measurements are present?                                                                                   |
| <b>Longitudinal</b>            | What is the association of conventional hemodynamic variables with the cardiac output measured on two different points: within the first 24 hours of admission and 24 hours thereafter? |
| <i>Status: ongoing</i>         |                                                                                                                                                                                         |
| <b>RV-dilatation &amp; AKI</b> | Is right ventricular volume overload measured by tricuspid insufficiency and right ventricle diameter associated with acute kidney injury in ICU patients?                              |
| <i>Status: ongoing</i>         |                                                                                                                                                                                         |
| <b>Fluid responsiveness</b>    | Do variations in end-tidal carbon dioxide and carotid peak systolic velocity induced by the PLR test predict fluid responsiveness?                                                      |
| <i>Status: planned</i>         | Can continuous cardiac output monitoring through arterial pulse contour analysis be used in the evaluating the response to the PLR test?                                                |
| <b>10. ARDS</b>                | To follow.                                                                                                                                                                              |
| <i>Status: planned</i>         |                                                                                                                                                                                         |

**Abbreviations:** NIRS, near-infrared spectroscopy; StO<sub>2</sub>, peripheral tissue oxygen saturation; PEEP, peak end-expiratory pressure; RV, right ventricle; TAPSE, tricuspid annular plane systolic excursion, TTE, transthoracic echocardiography; AKI, acute kidney injury; ICU, intensive care unit; PLR, passive leg raising.

### 13 Participant timeline

Eligible patients will be included within 24 hours after their arrival on the Intensive Care Unit. After inclusion all study parameters will be obtained once through physical examination combined with transthoracic echocardiography. Mortality will be assessed at 7 days after admission. Additionally, mortality will be assessed at 30 and 90 days after admission. (See appendix 2)

### 14 Sample size

There are no previous studies with data on including a combination of all available hemodynamic variables into one model estimating cardiac output and mortality. This makes it difficult to calculate sample size. We will therefore make an estimation based on the number of ICU admissions per year. Each year 3000 patients are admitted to one of four ICU units. Approximately 1500 of these admissions are unplanned emergency admissions. We estimate that half of these unplanned admissions fulfill the inclusion criteria. This leaves 750 patients eligible for inclusion. However, we assume that we will not be able to include all eligible patients for logistic and practical reasons. Therefore we aim to include 400 patients per year. With emergency admission critical care mortality

approaching 25% this will enable us to include at least ten variables in the final model for predicting mortality (acknowledging that at least 10 events are necessary for each variable included in the final model (16)).

### **15 Recruitment**

Inclusion of patients and measurements of variables (both conventional hemodynamic variables and ultrasound variables) will be performed by the study coordinator or a co-researcher under supervision and responsibility of the principle investigator. Informed consent will be obtained.

### **16 Informed consent**

The local institutional review board (Medisch Ethische Toetsingscommissie, UMCG; METc M15.168207) approved the study. As part of our hospital research code the patient or legal representative was aware of the ongoing study and patients were asked to give informed consent to review their electronic patients charts for additional clinical data, such as laboratory measurements, discharge diagnoses and outcome. If the patient was (temporarily) incompetent, a legal representative was approached and the patients' consent was asked at a later time, once they had regained legal competence. If asking informed consent was deemed too burdensome for the legal representative, e.g. due to a worrisome prognosis or imminent death, we waived our inquiry for informed proxy consent. According to the local UMCG research code we were authorized to use anonymous observational data if obtaining informed consent is judged to be reasonably impossible to obtain. After January 1st, 2016, all observational anonymous patient data may be used for scientific purposes unless a patient explicitly objects to usage of his/her data.

**[17] Assignment of interventions**

No intervention is applied.

**17 Blinding (masking)**

Due to the observational nature of the study, neither the study coordinator or any of the co-researchers nor patients will be blinded to the measurements. All echocardiographic measurements will be validated by an echocardiography laboratory technician or cardiologist who will be blinded for all other measurements.

## [18-20] Methods: Data collection, management, analysis

### 18 Data collection methods

Within 24 hours of ICU admission, all hemodynamic variables will be obtained through a onetime physical examination combined with transthoracic echocardiography. Other variables (i.e. lab values) will be obtained from the patient' file at a later moment. The rationale and specific details of measuring each variable are described extensively below.

For a flow-chart of data collection, see appendix 2. See appendix 3 for a complete overview of all variables. See appendix 4 for a detailed description of the echocardiography protocol. In the summation below, the '●' indicate that these measurements are part of the basic research line, whereas numbers indicate the sub-study/add-on number for which the new measurement was added.

Systemic circulatory variables:

- *Cardiac output (CO)*: it will be measured by transthoracic echocardiography, performed by different trained researchers. Both cardiac output and cardiac index (i.e. cardiac output corrected for body surface area) will be calculated. (See appendix 4 for a detailed description of the echocardiography protocol).
- *Stroke volume (SV)*: this will be automatically calculated by dividing cardiac output by heart rate, both measured by transthoracic echocardiography.
- *Heart rate (HR)*: it will be recorded from the bedside electrocardiographic monitor. In case of an irregular rhythm (i.e. atrial fibrillation) we will use the mean heart rate over a minute. Apart from heart rate the presence of atrial fibrillation will be recorded.
- *Systolic blood pressure (SBP), diastolic blood pressure (DBP) and mean arterial pressure (MAP)*: these will be obtained by intravascular measurement using an arterial line, which is part of usual care. To allow for comparison, these variables will also be measured using a sphygmomanometer. In the latter case, mean arterial pressure will be calculated using the following formula:  $MAP = (SBP + 2*DBP)/3$

- *Central venous pressure (CVP)*: this will be recorded in case a central venous line is present in the internal jugular or subclavian vene.

Micro- and peripheral circulatory variables:

- *Capillary refill time (CRT)*: this will be measured after 15 seconds of exerting firm pressure preferably on the sternum, the distal phalanx of the index finger, and on the central part of the knee. The original upper limit of a normal CRT was considered to be 2 seconds by Champions' Trauma score (17). However Schriger and Baraff examined CRT in a healthy population and discovered it to be age and temperature dependent, with an upper limit for healthy older adults of 4.5 seconds (18). In a recent study Ait-Oufella et al found that an index CRT upper limit of 2.4 seconds is predictive of 14 day mortality in septic shock patients. (13) We will therefore both use a cut-off value of 4,5 seconds and a continuous measure of CRT.
- *Skin temperature (T<sub>skin</sub>)*: this will be measured subjectively and objectively. The subjective measure will be conducted by palpating the patient's extremities. A distinction between either 'warm' or 'cold' will be made using the dorsal surface of the hands of the examiner. Patients will be considered to have 'cold' skin extremities if all examined extremities are considered cool, or if only the lower extremities are cool despite warm upper extremities.

To objectify the skin temperature, the use of a central-to-peripheral and peripheral-to-ambient temperature difference (respectively dT<sub>c-p</sub> and dT<sub>p-a</sub>) or the forearm-to-finger skin-temperature gradient (T<sub>skin-diff</sub>) have been proposed in literature (10,11,19,20). We will make use of: ~~two different measurements:~~

- *Central-to-peripheral temperature difference (dT<sub>c-p</sub>)*: to measure this difference we will compare bladder temperature, as measured by a bladder thermistor catheter, with foot temperature, measured by a skin probe (DeRoyal Skin Temperature Sensor product nr 81-010400EU) on either the left or the right big toe, as well as the left or right dorsum of foot. We will use bladder temperature as a surrogate for central temperature, and toe temperature as a peripheral measure. In literature a temperature difference of either 5°C or 7 °C is generally used as an upper limit (11,21,22). We will therefore regard values higher than 7°C as abnormal.
- ~~*Forearm to finger gradient (T<sub>skin-diff</sub>)*: we will also measure this gradient, since it has been validated by Rubinstein et al as an accurate measure of thermoregulatory peripheral~~

~~vasoconstriction. (23) T<sub>skin-diff</sub> will be measured using two skin probes, one attached to the index finger and the other to the radial side of the forearm, mid-way between elbow and wrist. Based on previous studies we choose a T<sub>skin-diff</sub> of 0°C as cut-off point, larger values will be regarded as an indication of peripheral vasoconstriction. (11,24)~~

- *The mottling score*: this score was described by Ait-Oufella et al in 2011 (14). Mottling is the patchy discoloration of the skin caused by microcirculatory dysfunction. It usually involves the area around the knee. The Mottling score ranges from 0 -5, depending on the extensiveness of the mottled area. A score of 0-1 is regarded mild, 2-3 moderate and 4-5 severe (also see appendix 3).
- *Urine output (ml/kg/h)*: this is also measured as part of regular care. We will use both the urine output over the hour before examination and the mean urine output per hour, calculated using the six hours prior to the physical examination. If these data are unavailable, the mean urine output of the previous hour(s) will be calculated depending on the available data. In patients with pre-existing renal failure the urinary output will not be used.
- 1. *Near infrared spectroscopy (NIRS) (April 1<sup>st</sup>, 2015 until August 5<sup>th</sup>, 2015)*: NIRS measurements were made using InSpectra™ tissue oxygenation monitor, model 650 (Hutchinson Technology, Inc., Hutchinson, MN). Due to budgetary reasons purchasing an InSpectra 650 by the ICU-research department was impossible. The InSpectra 650 was borrowed from the department of Anesthesiology and inclusion of patients depended on availability at time of inclusion. In eligible patients, we evaluated StO<sub>2</sub> measurements on both knee and thenar. The average StO<sub>2</sub> value was calculated over 30 seconds after one minute of signal stabilization.

Additional ultrasonic measurements:

2. *Lung ultrasound (per September 1<sup>st</sup>, 2015)*: we acquired lung ultrasound at six different positions according the BLUE-protocol (25). The presence of B-lines was noted according a grading system and a B-profile was established. A detailed protocol is provided in Appendix 5.
3. *Peak end-expiratory pressure (PEEP) challenge (September 1<sup>st</sup>, 2015 until January 3<sup>rd</sup>, 2016)*: an additional 10 cm H<sub>2</sub>O of PEEP was temporarily applied when supervised by the treating intensivist. PEEP was elevated for a maximum duration of 5 minutes during which the new

hemodynamic variables were recorded. This duration of elevation was chosen in accordance with the protocol for the PEEP challenge designed and used by Geerts et al (26). We recorded the hemodynamic variables at the new PEEP level: *heart rate (beats per minute), systolic blood pressure (mmHg), diastolic blood pressure (mmHg), mean arterial pressure (mmHg), central venous pressure (mmHg) and cardiac output (L/min)*.

4. *Tricuspid annular plane systolic excursion (TAPSE)* (per February 10<sup>th</sup>, 2016): we assessed right ventricular function by measuring the TAPSE. In literature cutoffs for TAPSE differ from 13.5 mm to 18.5 mm. Following the American Society of Echocardiography guidelines we will regard TAPSE values lower than 16 mm as abnormal (27).
4. *Systolic excursion velocity (RV s')*: (per February 10<sup>th</sup>, 2016): According to Rudski et al measurements of both TAPSE and RV s' provide a reliable assessment of right ventricular function (27). Similar to TAPSE cut-offs for RV s' differ (7.3 cm/s to 12.3 cm/s for RV s'). According to the American Society of Echocardiography guidelines we will regard RV S' values of 10 cm/s or lower as abnormal (27).
5. *Common carotid artery, subclavian artery, and common femoral artery flow* (April 14<sup>th</sup>, 2016 until August 17<sup>th</sup>, 2016): for sub-study 5 we aimed to measure a proxy for abdominal flow by subtracting flow over both left and right carotid, subclavian and femoral arteries from the cardiac output. Flow over these arteries could be determined by measuring the *diameter of the artery (mm)* and the *average velocity of blood flow (ml/min)* in the abovementioned arteries.
6. *FloTrac* (per June 1<sup>st</sup>, 2016): The FloTrac (Edwards Lifesciences) measures *cardiac output (L/min)* by analyzing the arterial pulse waveform. Its accuracy was validated by concurrently measuring the cardiac output from the FloTrac device at the same time the blood flow through the ventricular outflow tract was measured with echocardiography. Paired cardiac output measurements were performed hourly after admission for 4 hours and once 24 hours after admission. Factors that might influence FloTrac cardiac output measurements (28,29) were also recorded: *inotropics usage* and *echocardiography image quality (poor, suboptimal, optimal)*. In addition, we also noted the *mottling scores* and dosages of *inotropics (ug/kg/min)*.
7. *Right ventricular volume status* (per October 25<sup>th</sup>, 2016): we will estimate right ventricular volume load by tricuspid insufficiency and right ventricular diameter according to Rudski et al (27).



8. *Tricuspid regurgitation velocity (per October 25<sup>th</sup>, 2016)*: we will assess the presence of tricuspid regurgitation by measuring the velocity of retrograde flow in the tricuspid valve. The cut-offs for tricuspid valve insufficiency is set at 2.4 m/s according to Rudski et al (27).

Other variables recorded at bedside:

- *Respiratory rate*: this will be recorded of the bedside electrocardiographic monitor. If a patient is on mechanical ventilation, see below.
- *AVPU scale*: this can be used to obtain a quick impression of a patient's state of consciousness and consists of the options: 'Alert', 'responsive to Voice', 'responsive to Pain' and 'Unresponsive.' It is often applied in the emergency room and the general wards as part of the 'MEWS' (Modified Early Warning Score) (30,31). We will score the AVPU scale as a separate item.
- *Cardiac murmurs*: we will auscultate the heart for the presence of a murmur. The potential cause of a cardiac murmur ranges from completely innocent to advanced valvular disease, each with its own distinctive characteristics. For study purposes, we will score this item as: present or absent.
- *Crepitations*: we will auscultate the lungs for crepitations, or crackles. In general a distinction between in- or expiratory and fine or coarse crepitations is made (32). Crepitations can be a symptom of several diseases, ranging from pneumonia and pulmonary edema to interstitial lung fibrosis (32). For study purposes, we will only make a distinction in: present or absent.
- 2. *Rhonchi (per September 1<sup>st</sup>, 2015)*: we will also auscultate the lungs for rhonchi or wheezes. A distinction between in- and/or expiratory rhonchi as well as high or low-frequent rhonchi can be made (32). Rhonchi or wheezes can be a symptom of asthma, chronic obstructive pulmonary disease or pulmonary secretions. For study purposes, we will score this item as: present or absent.
- *Mechanical ventilation*: data on the presence and type of mechanical ventilation will be gathered, as well as basic information on respiratory conditions (i.e. PEEP and respiratory rate). Note: in case of mechanical ventilation the value 'respiratory rate' will be filled in twice in the CRF. If both values are the same, it will be assumed that the patient breathes at a machine-set respiratory rate. If they differ, spontaneous breathing will be assumed. Tidal volume and inspiratory oxygen (percentage) were added *per September 1<sup>st</sup>, 2015*.
- *Inotrope and vasopressor use*: any inotrope or vasopressor requirement, type, dose and speed will be recorded.

- *Estimations of pump function and peripheral circulation:* an estimation will be made, either by a member of the treating team, or by the researcher.

Longitudinal assessment of above hemodynamic variables (per August 12<sup>th</sup>, 2015):

7. To evaluate the association of conventional hemodynamic variables with the cardiac output on two different points: within the first 24 hours of admission and 24 hours thereafter.

Laboratory values closest to examination:

- *Blood gas analysis: arterial pH, carbon dioxide, oxygen, bicarbonate, base excess, lactate and hemoglobin:* these are frequently determined as part of regular ICU physiologic monitoring. For study purposes, we will use the value closest to our examination. Arterial hemoglobin and lactate will serve as markers for macrocirculatory and microcirculatory status, respectively. Arterial oxygen levels will be used to determine the PaO<sub>2</sub>/FiO<sub>2</sub> ratio closest to our examination.
- Serum leucocytes, hematocrit, thrombocytes, high-sensitive troponin-T, aspartate transaminase, alanine transaminase, total and direct bilirubin: these are determined as part of regular care. For study purposes, we will use the value closest to our examination. These lab values are added for determination of sequential organ failure assessment (SOFA)-scores, blood viscosity, cardiomyocyte damaging and congestion of liver flow.
- 8. *Serum creatinine, urea and albumin:* these are determined as part of regular care. For study purposes, we will use values at admission, closest to our examination and the determined values until 72 hours after examination.
- 8. *24-hour urine creatinine, urea and albumin:* these are determined as part of regular care. For study purposes. We will use values at admission, closest to our examination and the determined values until 72 hours after examination.

After the physical examination has been performed, information on the following general characteristics will be extracted from patient files: demographic data, diagnoses and severity of illness as evaluated by the APACHE II and IV scores, Simplified Acute Physiology Score II (SAPS) and the Sequential Organ Failure Assessment (SOFA) (33-35). Furthermore we will collect EMV scores, lab values (details are described above), urine output (details are described above), ~~routine admission ECG's and routine~~ and evaluate admission thorax photo's on the presence of consolidations, overfilling and pleural effusions. We will also score known risk factors of ARDS according to the Berlin

criteria (36). After 90 days we will assess the patient files again to gather information on total ICU stay in days and 7-, 30- and 90-day mortality.

## 19 Data management

Data will be recorded using OpenClinica and transferred for analysis. After transfer from OpenClinica, all data will be managed in a database created using Stata version 14.2 (StataCorp, College Station, TX).

All study subjects will receive a study subject ID, compiled of the study name and their inclusion number (table 1) This study subject ID will be used in both OpenClinica and Stata. Only a researcher with 'study director' account properties in OpenClinica will be able to link study subject ID to patient number.

| Study name | Inclusion number | Study subject ID |
|------------|------------------|------------------|
| SICS1      | 0001             | SICS1_0001       |
| SICS1      | 0002             | SICS1_0002       |

**Table 2.** Compiling study subject ID's

~~Images will be saved anonymously and will be coded in a systematic fashion, using the study subject ID, session number, and image contents. An example is in table 2.~~

| Study subject number  | Session number | Image contents  | Image name                    |
|-----------------------|----------------|-----------------|-------------------------------|
| <del>SICS1_0001</del> | <del>01</del>  | <del>LVOT</del> | <del>SICS1_0001_01_LVOT</del> |
| <del>SICS1_0001</del> | <del>01</del>  | <del>ECG</del>  | <del>SICS1_0001_01_ECG</del>  |

**Table 2.** Naming of images

For a complete overview of naming images see appendix 4, 5 and 6. A standardized way of inclusion and adding subjects to the database is provided in appendix 6 (Dutch).

## 20 Statistical methods

### a) Outcomes

We will use the general characteristics to create a baseline table. Statistical analyses will be performed using Stata version 14.2 (StataCorp, College Station, TX). Data will be presented as means with standard deviation if normally distributed or as medians with ranges in case of skewed data.

**b) Additional analyses**

Univariate analyses will be conducted and all variables with  $p < 0.1$  will be included in the multivariate models. Multivariate analyses will be conducted using a stepwise model. Cardiac output will be modeled using linear regression and mortality will be modeled using logistic regression. All analyses will be adjusted for age and gender; other general characteristics will not be added to the model standardly. All analyses will be tested two-sided and p-values of less than 0.05 will be considered statistical significant.

**c) Analysis population and missing data**

Primary analyses will be performed with imputation for missing data using multiple imputations. Robustness of conclusions will be checked by secondary sensitivity analyses only including available data.

**d) Subgroup analyses**

If sample size permits, we will conduct an analysis in different subpopulations. Examples of subpopulations that may be eligible for further analysis are those with different types of shock (distributive, obstructive, hypovolemic, cardiogenic), CVVH, heart failure by any cause, myocardial infarction, atrial fibrillation or surgery versus no-surgery patient groups.

## [21] Appendices

### Appendix 1A: Overview of the add-ons and their starting date

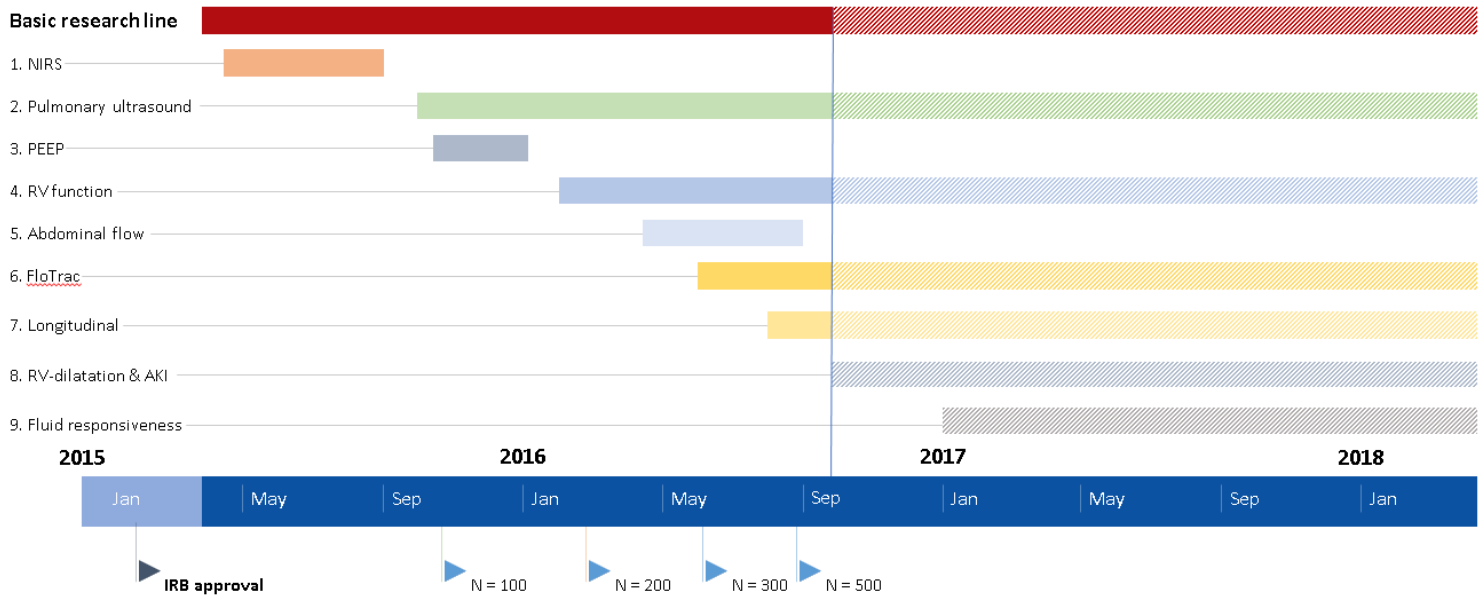

**Figure 1.** Overview of add-ons and their starting dates

### Appendix 1B: Table of add-ons and their starting date

| Add-on title         | Dates                  | SICS nr     | Notes  |
|----------------------|------------------------|-------------|--------|
| NIRS                 | 01-04-'15 to 05-08-'15 | 5 to 85     | N = 35 |
| Pulmonary ultrasound | 09-09-'15 to date      | 86 to date  |        |
| PEEP challenge       | 01-09-'15 to 03-01-'15 | 86 to 151   | N = 8  |
| RV-function          | 10-02-'16 to date      | 194 to date |        |
| Abdominal flow       | 14-04-'16 to 17-08-'16 | 278 to 501  | N = 59 |
| FloTrac              | 01-06-'16 to date      | 378 to date | N = 13 |
| Longitudinal         | 12-08-'16 to date      | 493 to date | N = 28 |
| RV-dilatation & AKI  | 25-10-'16 to date      | 600 to date |        |
| Fluid responsiveness | 01-01-'17 (planned)    | To follow   |        |

**Abbreviations:** NIRS = near infrared spectroscopy; PEEP = peak end-expiratory pressure; RV = right ventricle; AKI = acute kidney injury.

**Note:** not all patients could be included in the add-on studies. Add-on 1: unavailability of the InSpectra (n = 29), cirrhosis (n = 8), no consent (n = 5) or a total hemoglobin index below 5 (n = 3). Add-on 3: no mechanical ventilation (n = 37), no intensivist available for supervision (n = 12), contraindication for challenge (n = 8). Add-on 5: flow measurements too time consuming (n = 153), inadequate flow measurements (n = 7), inadequate cardiac output measurements (n = 3), refusal of consent (n = 1). Add-on 6 and 7: only includes a subpopulation of patients in circulatory shock.

## Appendix 2: Flow chart of data collection moments

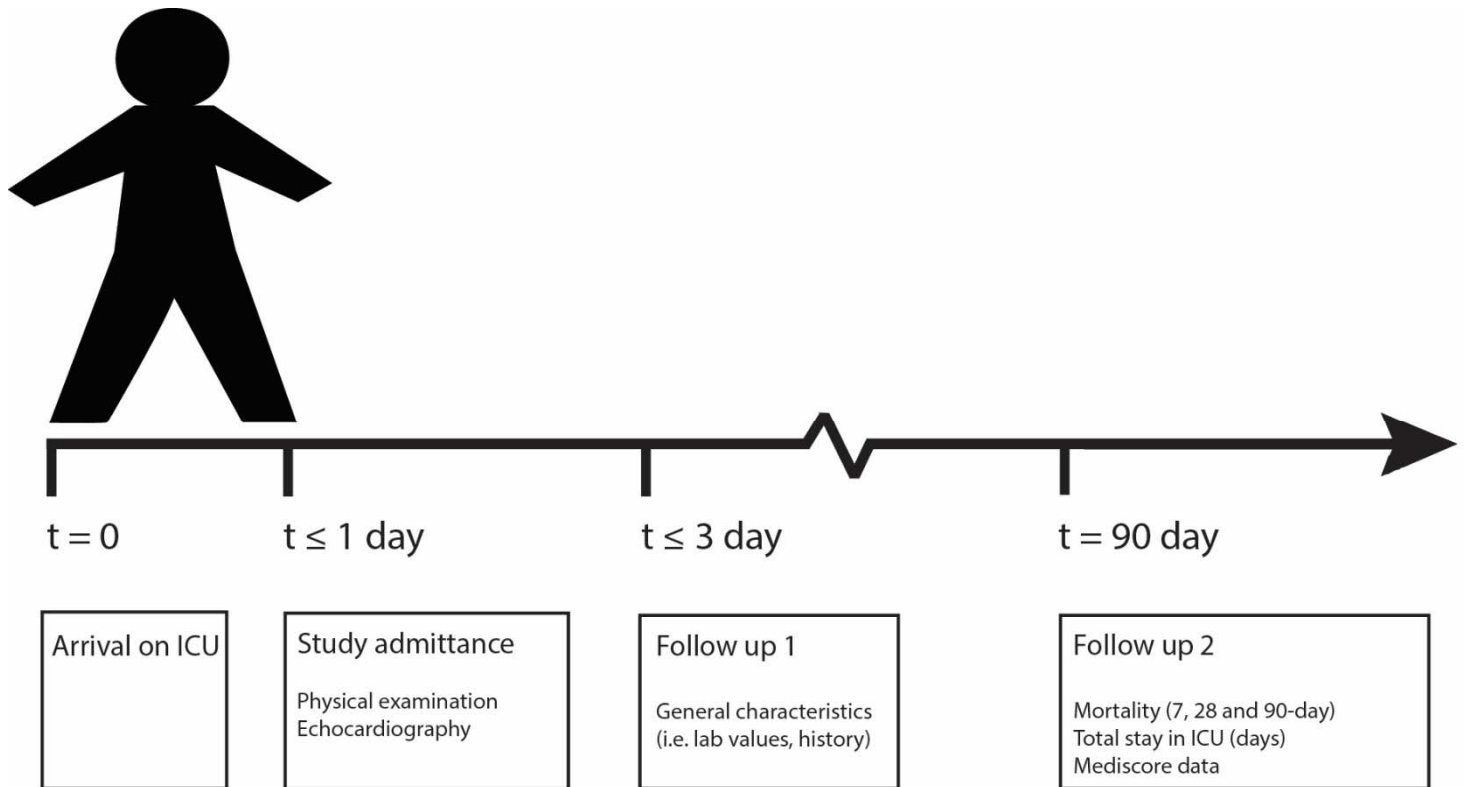

Figure 2. Flow chart of data collection moments

### Appendix 3: Variables

**Table 3. Overview of all variables.** From left to right: the variables, their potential outcome, the method and timing of measurements, and how they will be recorded.

| Variable                       | Value                                                                                       | How to measure                    | When to obtain | Database    |
|--------------------------------|---------------------------------------------------------------------------------------------|-----------------------------------|----------------|-------------|
| Study subject ID               | SICS_0001, etc.                                                                             | Decoding file or poliplus         | Admittance     | OpenClinica |
| Examination date               | -                                                                                           | -                                 | Admittance     | OpenClinica |
| Examination time               | -                                                                                           | -                                 | Admittance     | OpenClinica |
| Gender                         | M/F                                                                                         | Poliplus                          | Admittance     | OpenClinica |
| Age                            | -                                                                                           | Poliplus                          | Admittance     | OpenClinica |
| Height                         | 0 - 240                                                                                     | Patient file                      | Admittance     | OpenClinica |
| Weight                         | 0 - 300                                                                                     | Patient file                      | Admittance     | OpenClinica |
| Respiratory rate               | 0 - 60                                                                                      | Observation                       | Admittance     | OpenClinica |
| Heart rate                     | 0 - 300                                                                                     | ECG monitor (ECG leads)           | Admittance     | OpenClinica |
| Heart rhythm                   | Reg/irr                                                                                     | ECG monitor (ECG leads)           | Admittance     | OpenClinica |
| Atrial fibrillation            | Y/N                                                                                         | ECG monitor (ECG leads)           | Admittance     | OpenClinica |
| Systolic blood pressure 1      | 0 - 350                                                                                     | ECG monitor (artery line)         | Admittance     | OpenClinica |
| Diastolic blood pressure 1     | 0 - 200                                                                                     | ECG monitor (artery line)         | Admittance     | OpenClinica |
| Mean arterial pressure 1       | 0 - 150                                                                                     | ECG monitor (artery line)         | Admittance     | OpenClinica |
| Blood pressure 1 arm           | Left/right                                                                                  | Observation                       | Admittance     | OpenClinica |
| Central venous pressure        | 0 - 40                                                                                      | ECG monitor (central venous line) | Admittance     | OpenClinica |
| Urine output one hour          | 0 - 1500                                                                                    | Poliplus / urine catheter         | Admittance     | OpenClinica |
| Urine output total             | 0 - 6000                                                                                    | Poliplus / urine catheter         | Admittance     | OpenClinica |
| Urine output 'x' hours         | 0 - 6                                                                                       | Poliplus / urine catheter         | Admittance     |             |
| Inotropics type                | -                                                                                           | Bedside pump                      | Admittance     | OpenClinica |
| Inotropics dose                | 5-in-50, 10-in-50, 20-in-50, 50-in-50, 100-in-50, 200-in-50, 250-in-50, 500-in-50, 40-in-40 | Bedside pump                      | Admittance     | OpenClinica |
| Inotropics speed               | 0 - 50                                                                                      | Bedside pump                      | Admittance     | OpenClinica |
| Mechanical ventilation         | Y/N                                                                                         | Ventilation machine               | Admittance     | OpenClinica |
| PEEP                           | 0 - 30                                                                                      | Ventilation machine               | Admittance     | OpenClinica |
| Respiratory rate machine (set) | 0 - 40                                                                                      | Ventilation machine               | Admittance     | OpenClinica |
| Tidal volume                   | 0 - 1000                                                                                    | Ventilation machine               | Admittance     | OpenClinica |

| Variable                              | Value                            | How to measure             | When to obtain | Database    |
|---------------------------------------|----------------------------------|----------------------------|----------------|-------------|
| Inspiratory O <sub>2</sub> percentage | 0 - 100                          | Ventilation machine        | Admittance     | OpenClinica |
| AVPU score                            | 0 - 3                            | Observation                | Admittance     | OpenClinica |
| Systolic blood pressure 2             | 0 - 350                          | Sphygmomanometer (cuff)    | Admittance     | OpenClinica |
| Diastolic blood pressure 2            | 0 - 200                          | Sphygmomanometer (cuff)    | Admittance     | OpenClinica |
| Mean arterial pressure 2              | 0 - 150                          | Sphygmomanometer (cuff)    | Admittance     | OpenClinica |
| Blood pressure 2 arm                  | Left/right                       | Observation                | Admittance     | OpenClinica |
| Souffles                              | Y/N                              | Auscultation               | Admittance     | OpenClinica |
| Rales/crepitations                    | Y/N                              | Auscultation               | Admittance     | OpenClinica |
| Rhonchi                               | Y/N                              | Auscultation               | Admittance     | OpenClinica |
| Mottling score                        | 0-5                              | Observation (see figure 2) | Admittance     | OpenClinica |
| Capillary refill index sternum        | 0 - 25                           | Palpation                  | Admittance     | OpenClinica |
| Capillary refill index finger         | 0 - 25                           | Palpation                  | Admittance     | OpenClinica |
| Capillary refill knee                 | 0 - 25                           | Palpation                  | Admittance     | OpenClinica |
| Temperature subjective                | Warm/cold                        | Palpation                  | Admittance     | OpenClinica |
| Temperature forearm                   | 0 - 45                           | Skin probes                | Admittance     | OpenClinica |
| Temperature index finger              | 0 - 45                           | Skin probes                | Admittance     | OpenClinica |
| Tskin-diff                            | 0 - 45                           | Calculation                | Admittance     | OpenClinica |
| Temperature central                   | 1 - 45                           | Bladder temp probes        | Admittance     | OpenClinica |
| Temperature peripheral big toe        | 2 - 45                           | Skin probes                | Admittance     | OpenClinica |
| Temperature peripheral dorsum of foot | 2 - 45                           | Skin probes                | Admittance     | OpenClinica |
| dTc-p                                 | 3 - 45                           | Calculation                | Admittance     | OpenClinica |
| Peripheral circulation estimation     | Poor/good perfusion              | Question                   | Admittance     | OpenClinica |
| Pump function estimation              | Poor, moderate, reasonable, good | Question                   | Admittance     | OpenClinica |
| Degree of training                    | Nurse to intensivist             | Question                   | Admittance     | OpenClinica |
| LVOT diameter                         | 0 - 10                           | Echocardiography           | Admittance     | OpenClinica |
| Peak flow velocity                    | 0 - 10                           | Echocardiography           | Admittance     | OpenClinica |
| Velocity time integral                | 0 - 100                          | Echocardiography           | Admittance     | OpenClinica |
| Heart rate (echo)                     | 0 - 300                          | Echocardiography           | Admittance     | OpenClinica |
| Cardiac output                        | 0 - 20                           | Echocardiography           | Admittance     | OpenClinica |
| Cardiac index                         | 0 - 20                           | Echocardiography           | Admittance     | OpenClinica |
| Stroke volume                         | 0 - 200                          | Echocardiography           | Admittance     | OpenClinica |



| Variable                        | Value                | How to measure       | When to obtain | Database    |
|---------------------------------|----------------------|----------------------|----------------|-------------|
| PLAX                            | SICS1_0001_01_ PLAX  | Echocardiography     | Admittance     | OpenClinica |
| PLAX – LVOT                     | SICS1_0001_01_ LVOT  | Echocardiography     | Admittance     | OpenClinica |
| AP5CH                           | SICS1_0001_01_ AP5CH | Echocardiography     | Admittance     | OpenClinica |
| AP5CH – VTI                     | SICS1_0001_01_ VTI   | Echocardiography     | Admittance     | OpenClinica |
| StO <sub>2</sub> thenar         | 0 - 100              | InSpectra™           | Admittance     | OpenClinica |
| StO <sub>2</sub> knee           | 0 - 100              | InSpectra™           | Admittance     | OpenClinica |
| B-lines superior left           | 0 - 5                | Pulmonary ultrasound | Admittance     | OpenClinica |
| B-lines superior right          | 0 - 5                | Pulmonary ultrasound | Admittance     | OpenClinica |
| B-lines inferior left           | 0 - 5                | Pulmonary ultrasound | Admittance     | OpenClinica |
| B-lines inferior right          | 0 - 5                | Pulmonary ultrasound | Admittance     | OpenClinica |
| B-lines lateral left            | 0 - 5                | Pulmonary ultrasound | Admittance     | OpenClinica |
| B-lines lateral right           | 0 - 5                | Pulmonary ultrasound | Admittance     | OpenClinica |
| PEEP - heart rate               | 0 - 300              | Echocardiography     | Admittance     | OpenClinica |
| PEEP - systolic blood pressure  | 0 - 350              | Echocardiography     | Admittance     | OpenClinica |
| PEEP - diastolic blood pressure | 0 - 200              | Echocardiography     | Admittance     | OpenClinica |
| PEEP – mean arterial pressure   | 0 - 150              | Echocardiography     | Admittance     | OpenClinica |
| PEEP – Blood pressure arm       | Left/right           | Echocardiography     | Admittance     | OpenClinica |
| PEEP – Central venous pressure  | 0 - 40               | Echocardiography     | Admittance     | OpenClinica |
| PEEP – Cardiac output           | 0 - 20               | Echocardiography     | Admittance     | OpenClinica |
| TAPSE                           | 0 - 50               | Echocardiography     | Admittance     | OpenClinica |
| RV S'                           | 0 - 40               | Echocardiography     | Admittance     | OpenClinica |
| CCA flow left                   | 0 - 3000             | Vascular ultrasound  | Admittance     | OpenClinica |
| CCA flow right                  | 0 - 3000             | Vascular ultrasound  | Admittance     | OpenClinica |
| CCA TAm <sub>ean</sub> left     | 0 - 100              | Vascular ultrasound  | Admittance     | OpenClinica |
| CCA TAm <sub>ean</sub> right    | 0 - 100              | Vascular ultrasound  | Admittance     | OpenClinica |
| CCA diameter left               | 0 - 1                | Vascular ultrasound  | Admittance     | OpenClinica |
| CCA diameter right              | 0 - 1                | Vascular ultrasound  | Admittance     | OpenClinica |
| CCA flow left                   | 0 - 2000             | Vascular ultrasound  | Admittance     | OpenClinica |
| CCA flow right                  | 0 - 2000             | Vascular ultrasound  | Admittance     | OpenClinica |
| SCA TAm <sub>ean</sub> left     | 0 - 100              | Vascular ultrasound  | Admittance     | OpenClinica |
| SCA TAm <sub>ean</sub> right    | 0 - 100              | Vascular ultrasound  | Admittance     | OpenClinica |

| Variable                              | Value                               | How to measure                    | When to obtain | Database    |
|---------------------------------------|-------------------------------------|-----------------------------------|----------------|-------------|
| SCA diameter left                     | 0 - 1                               | Vascular ultrasound               | Admittance     | OpenClinica |
| SCA diameter right                    | 0 - 1                               | Vascular ultrasound               | Admittance     | OpenClinica |
| SCA flow left                         | 0 - 2000                            | Vascular ultrasound               | Admittance     | OpenClinica |
| SCA flow right                        | 0 - 2000                            | Vascular ultrasound               | Admittance     | OpenClinica |
| CFA TAm <sub>ean</sub> left           | 0 - 100                             | Vascular ultrasound               | Admittance     | OpenClinica |
| CFA TAm <sub>ean</sub> right          | 0 - 100                             | Vascular ultrasound               | Admittance     | OpenClinica |
| CFA diameter left                     | 0 - 1                               | Vascular ultrasound               | Admittance     | OpenClinica |
| CFA diameter right                    | 0 - 1                               | Vascular ultrasound               | Admittance     | OpenClinica |
| CFA flow left                         | 0 - 2000                            | Vascular ultrasound               | Admittance     | OpenClinica |
| CFA flow right                        | 0 - 2000                            | Vascular ultrasound               | Admittance     | OpenClinica |
| RV basal diameter                     | 0 – 99                              | Echocardiography                  | Admittance     | OpenClinica |
| RV mid cavity diameter                | 0 – 99                              | Echocardiography                  | Admittance     | OpenClinica |
| RV longitudinal diameter              | 0 - 99                              | Echocardiography                  | Admittance     | OpenClinica |
| Tricuspid regurgitation peak velocity | 0 - 30                              | Echocardiography                  | Admittance     | OpenClinica |
| Examination date                      | -                                   | -                                 | Add-on: 1-day  | OpenClinica |
| Examination time                      | -                                   | -                                 | Add-on: 1-day  | OpenClinica |
| Height                                | 0 - 240                             | Patient file                      | Add-on: 1-day  | OpenClinica |
| Weight                                | 0 - 300                             | Patient file                      | Add-on: 1-day  | OpenClinica |
| Respiratory rate                      | 0 - 60                              | Observation                       | Add-on: 1-day  | OpenClinica |
| Heart rate                            | 0 - 300                             | ECG monitor (ECG leads)           | Add-on: 1-day  | OpenClinica |
| Heart rhythm                          | Reg/irr                             | ECG monitor (ECG leads)           | Add-on: 1-day  | OpenClinica |
| Atrial fibrillation                   | Y/N                                 | ECG monitor (ECG leads)           | Add-on: 1-day  | OpenClinica |
| Systolic blood pressure 1             | 0 - 350                             | ECG monitor (artery line)         | Add-on: 1-day  | OpenClinica |
| Diastolic blood pressure 1            | 0 - 200                             | ECG monitor (artery line)         | Add-on: 1-day  | OpenClinica |
| MAP 1                                 | 0 - 150                             | ECG monitor (artery line)         | Add-on: 1-day  | OpenClinica |
| Blood pressure 1 arm                  | Left/right                          | Observation                       | Add-on: 1-day  | OpenClinica |
| CVP                                   | 0 - 40                              | ECG monitor (central venous line) | Add-on: 1-day  | OpenClinica |
| Urine output one hour                 | 0 - 1500                            | Poliplus / urine catheter         | Add-on: 1-day  | OpenClinica |
| Urine output total                    | 0 - 6000                            | Poliplus / urine catheter         | Add-on: 1-day  | OpenClinica |
| Urine output 'x' hours                | 0 – 6                               | Poliplus / urine catheter         | Add-on: 1-day  |             |
| Inotropics type                       | -                                   | Bedside pump                      | Add-on: 1-day  | OpenClinica |
| Inotropics dose                       | 5-in-50, 10-in-50, 20-in-50, 50-in- | Bedside pump                      | Add-on: 1-day  | OpenClinica |

| Variable                                    | Value                                                               | How to measure             | When to obtain | Database    |
|---------------------------------------------|---------------------------------------------------------------------|----------------------------|----------------|-------------|
|                                             | 50, 100-in-50,<br>200-in-50, 250-in-<br>50, 500-in-50, 40-<br>in-40 |                            |                |             |
| Inotropics speed                            | 0 - 50                                                              | Bedside pump               | Add-on: 1-day  | OpenClinica |
| Mechanical ventilation                      | Y/N                                                                 | Ventilation machine        | Add-on: 1-day  | OpenClinica |
|                                             |                                                                     |                            |                |             |
| PEEP                                        | 0 - 30                                                              | Ventilation machine        | Add-on: 1-day  | OpenClinica |
| Respiratory rate machine (set)              | 0 - 40                                                              | Ventilation machine        | Add-on: 1-day  | OpenClinica |
| AVPU score                                  | 0 - 3                                                               | Observation                | Add-on: 1-day  | OpenClinica |
| Souffles                                    | Y/N                                                                 | Auscultation               | Add-on: 1-day  | OpenClinica |
| Rales/crepitations                          | Y/N                                                                 | Auscultation               | Add-on: 1-day  | OpenClinica |
| Mottling score                              | 0-5                                                                 | Observation (see figure 2) | Add-on: 1-day  | OpenClinica |
| Capillary refill index finger               | 0 - 25                                                              | Palpation                  | Add-on: 1-day  | OpenClinica |
| Capillary refill knee                       | 0 - 25                                                              | Palpation                  | Add-on: 1-day  | OpenClinica |
| Temperature subjective                      | Warm/cold                                                           | Palpation                  | Add-on: 1-day  | OpenClinica |
| Temperature index finger                    | 0 - 45                                                              | Skin probes                | Add-on: 1-day  | OpenClinica |
| Tskin-diff                                  | 0 - 45                                                              | Calculation                | Add-on: 1-day  | OpenClinica |
| Temperature central                         | 1 - 45                                                              | Skin probes                | Add-on: 1-day  | OpenClinica |
| Temperature peripheral                      | 2 - 45                                                              | Skin probes                | Add-on: 1-day  | OpenClinica |
| dTc-p                                       | 3 - 45                                                              | Calculation                | Add-on: 1-day  | OpenClinica |
| Peripheral circulation<br><i>estimation</i> | Poor/good<br>perfusion                                              | Question                   | Add-on: 1-day  | OpenClinica |
| Pump function <i>estimation</i>             | Poor, moderate,<br>reasonable, good                                 | Question                   | Add-on: 1-day  | OpenClinica |
| Degree of training                          | Nurse to<br>intensivist                                             | Question                   | Add-on: 1-day  | OpenClinica |
| LVOT diameter                               | 0 - 10                                                              | Echocardiography           | Add-on: 1-day  | OpenClinica |
| Peak flow velocity                          | 0 - 10                                                              | Echocardiography           | Add-on: 1-day  | OpenClinica |
| Velocity time integral                      | 0 - 100                                                             | Echocardiography           | Add-on: 1-day  | OpenClinica |
| Heart rate (echo)                           | 0 - 300                                                             | Echocardiography           | Add-on: 1-day  | OpenClinica |
| Cardiac output                              | 0 - 20                                                              | Echocardiography           | Add-on: 1-day  | OpenClinica |
| Cardiac index                               | 0 - 20                                                              | Echocardiography           | Add-on: 1-day  | OpenClinica |
| Stroke volume                               | 0 - 200                                                             | Echocardiography           | Add-on: 1-day  | OpenClinica |
| Tricuspid annular plane systolic            | 0 - 50                                                              | Echocardiography           | Add-on: 1-day  | OpenClinica |

| Variable                                | Value                                                     | How to measure             | When to obtain   | Database    |
|-----------------------------------------|-----------------------------------------------------------|----------------------------|------------------|-------------|
| excursion                               |                                                           |                            |                  |             |
| systolic excursion velocity             | 0 - 40                                                    | Echocardiography           | Add-on: 1-day    | OpenClinica |
| FloTrac inclusion                       | Y/N                                                       | Inclusion criteria met?    | Add-on: FloTrac  | OpenClinica |
| FloTrac date                            | -                                                         | -                          | Add-on: FloTrac  | OpenClinica |
| FloTrac time                            | -                                                         | -                          | Add-on: FloTrac  | OpenClinica |
| FloTrac – velocity time integral (echo) | 0 - 40                                                    | Echocardiography           | Add-on: FloTrac  | OpenClinica |
| FloTrac – heart rate (echo)             | 0 - 200                                                   | Echocardiography           | Add-on: FloTrac  | OpenClinica |
| FloTrac – cardiac output (echo)         | 0 - 20                                                    | Echocardiography           | Add-on: FloTrac  | OpenClinica |
| FloTrac – quality (echo)                | Poor, suboptimal, optimal                                 | Echocardiography           | Add-on: FloTrac  | OpenClinica |
| FloTrac – cardiac output                | 0 - 20                                                    | EV1000® monitor            | Add-on: FloTrac  | OpenClinica |
| FloTrac – noradrenalin dose             | 0 - 1                                                     | Bedside pump               | Add-on: FloTrac  | OpenClinica |
| FloTrac – inotropic dose                | 0 - 1                                                     | Bedside pump               | Add-on: FloTrac  | OpenClinica |
| FloTrac – inotropic type                | -                                                         | Bedside pump               | Add-on: FloTrac  | OpenClinica |
| FloTrac – mottling score                | 0 - 5                                                     | Observation (see figure 2) | Add-on: FloTrac  | OpenClinica |
| ICU admission date                      | -                                                         | Poliplus                   | 3-days: clinical | OpenClinica |
| ICU admission time                      | -                                                         | Poliplus                   | 3-days: clinical | OpenClinica |
| EMV score                               | 0 - 15                                                    | Poliplus                   | 3-days: clinical | OpenClinica |
| Admission reason                        | -                                                         | Poliplus                   | 3-days: clinical | OpenClinica |
| Patient specifics                       | Surgery, CVVH, MI, congestive heart failure               | Poliplus                   | 3-days: clinical | OpenClinica |
| Shock type                              | Distributive, obstructive, cardiogenic, hypovolemic, none | Poliplus                   | 3-days: clinical | OpenClinica |
| Final diagnosis                         | -                                                         | Poliplus                   | 3-days: clinical | OpenClinica |
| X-Ray                                   | SICS1_0001_01_ Xray                                       | Poliplus                   | 3 days           | OpenClinica |
| EKG                                     | SICS1_0001_01_ EKG                                        | Poliplus                   | 3 days           | OpenClinica |
| Respiratory distress                    | -                                                         | Poliplus                   | 3-days: ARDS     | OpenClinica |
| Direct ARDS risk factors                | -                                                         | Poliplus                   | 3-days: ARDS     | OpenClinica |

| Variable                                              | Value       | How to measure | When to obtain      | Database    |
|-------------------------------------------------------|-------------|----------------|---------------------|-------------|
| Indirect ARDS risk factors                            | -           | Poliplus       | 3-days: ARDS        | OpenClinica |
| Arterial pH                                           | 6.75 - 7.75 | Poliplus       | 3-days: biochemical | OpenClinica |
| Arterial CO <sub>2</sub> pressure                     | 1.9 - 90    | Poliplus       | 3-days: biochemical | OpenClinica |
| Arterial O <sub>2</sub> pressure                      | 1.9 – 30    | Poliplus       | 3-days: biochemical | OpenClinica |
| Arterial bicarbonate (HCO <sub>3</sub> <sup>-</sup> ) | 5 - 50      | Poliplus       | 3-days: biochemical | OpenClinica |
| Arterial base excess                                  | -25 – 25    | Poliplus       | 3-days: biochemical | OpenClinica |
| Arterial lactate                                      | 0 - 30      | Poliplus       | 3-days: biochemical | OpenClinica |
| Arterial Hb                                           | 0 - 15      | Poliplus       | 3-days: biochemical | OpenClinica |
| Serum leucocytes                                      | 0 - 100     | Poliplus       | 3-days: biochemical | OpenClinica |
| Serum hematocrit                                      | 0.1 – 0.8   | Poliplus       | 3-days: biochemical | OpenClinica |
| Serum thrombocytes                                    | 0 - 800     | Poliplus       | 3-days: biochemical | OpenClinica |
| Serum NT-proBNP                                       | -           | Poliplus       | 3-days: biochemical | OpenClinica |
| Serum hs-troponin T                                   | -           | Poliplus       | 3-days: biochemical | OpenClinica |
| Serum ASAT                                            | -           | Poliplus       | 3-days: biochemical | OpenClinica |
| Serum ALAT                                            | -           | Poliplus       | 3-days: biochemical | OpenClinica |
| Serum total bilirubin                                 | 0 - 2000    | Poliplus       | 3-days: biochemical | OpenClinica |
| Serum direct bilirubin                                | 0 - 1500    | Poliplus       | 3-days: biochemical | OpenClinica |
| Serum creatinine                                      | 0.1 - 9999  | Poliplus       | 3-days: biochemical | OpenClinica |
| Serum urea                                            | 0.1 - 999   | Poliplus       | 3-days: biochemical | OpenClinica |
| Serum albumin                                         | 0.1 - 999   | Poliplus       | 3-days: biochemical | OpenClinica |
| Urine creatinine                                      | 0.1 - 9999  | Poliplus       | 3-days: biochemical | OpenClinica |
| Urine urea                                            | 0.1 - 999   | Poliplus       | 3-days: biochemical | OpenClinica |
| Urine albumin                                         | 0.1 - 999   | Poliplus       | 3-days: biochemical | OpenClinica |
| Urine total volume                                    | 0 - 20000   | Poliplus       | 3-days: biochemical | OpenClinica |
| Urine hours of collection                             | 0 - 24      | Poliplus       | 3-days: biochemical | OpenClinica |
| SOFA                                                  | 0–24        | Mediscore      | 90-days             | OpenClinica |
| APACHE II                                             | 0–71        | Mediscore      | 90-days             | OpenClinica |
| APACHE IV                                             | 0–286       | Mediscore      | 90-days             | OpenClinica |
| Mortality 7 day                                       | Y/N         | Poliplus       | 90-days             | OpenClinica |
| Mortality 30 day                                      | Y/N         | Poliplus       | 90-days             | OpenClinica |
| Mortality 90 day                                      | Y/N         | Poliplus       | 90-days             | OpenClinica |
| Total ICU stay                                        | days        | Poliplus       | 90-days             | OpenClinica |
| Medical history                                       | -           | Mediscore      | 90-days             | OpenClinica |
| Other lab values                                      | -           | Poliplus       | 90-days             | OpenClinica |
| Any missing value                                     | -9999       | -              | -                   | OpenClinica |

| Variable                 | Value | How to measure | When to obtain | Database    |
|--------------------------|-------|----------------|----------------|-------------|
| Any indeterminable value | -8888 | -              | -              | OpenClinica |

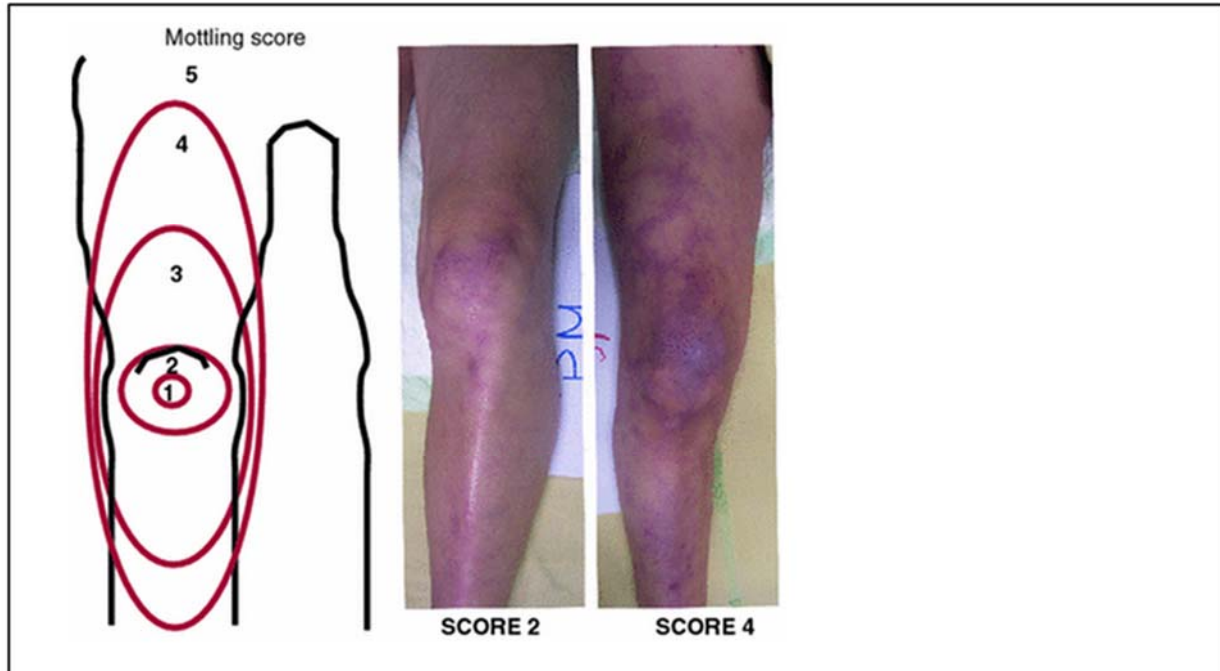

**Figure 2. Mottling score.** *Left:* the mottling score is based on a mottling area extension on the legs. Score 0 indicates no mottling ; score 1, a modest mottling area (coin size) localized to the center of the knee ; score 2, a moderate mottling area that does not exceed the superior edge of the kneecap ; score 3, a mild mottling area that does not exceed the middle thigh ; score 4, a severe mottling area that does not go beyond the fold of the groin ; score 5, an extremely severe mottling area that goes beyond the fold of the groin. *Right:* examples of the mottling score. Original illustration and text by Ait-Oufella et al (13)

### Appendix 3: Echocardiography protocol

#### General outline

Cardiac output and cardiac index will be measured using transthoracic echocardiography. For study purposes different researchers will be trained in the basics of transthoracic echocardiography by a cardiologist. They will learn how to determine cardiac output by obtaining four different echocardiographic views and subsequent measurements.

#### Procedure

Transthoracic echocardiography will be performed at the bedside during the physical examination with a mobile ultrasonic machine ie General Electric Vivid-S6 with the use of the cardiac probe M3S of M4S with default cardiac imaging setting. The patient will be supine or in left lateral tilt (partly on the left). Physical assessment will be performed before examination. After the images have been acquired, cardiac output and cardiac index will be calculated and data will be saved on the hard disk. At a later time the images will be validated by an echocardiography technician or a cardiologist who will be blinded for all other measurements.

#### Views and images

Three or four standardized echographic views will be obtained in all patients:

1. Parasternal long axis view (PLAX);
2. parasternal short axis view (PSAX);
3. apical four chamber view (AP4CH);
4. apical five chamber view (AP5CH).

The PSAX view will only be obtained in case the PLAX does not provide a clear image of the aortic annulus. The views are described in more detail below.

#### Parasternal long axis (PLAX)

The parasternal window is located next to the sternum, between the 3rd and 5th intercostal space.

Criteria of quality for a good view (figure 3):

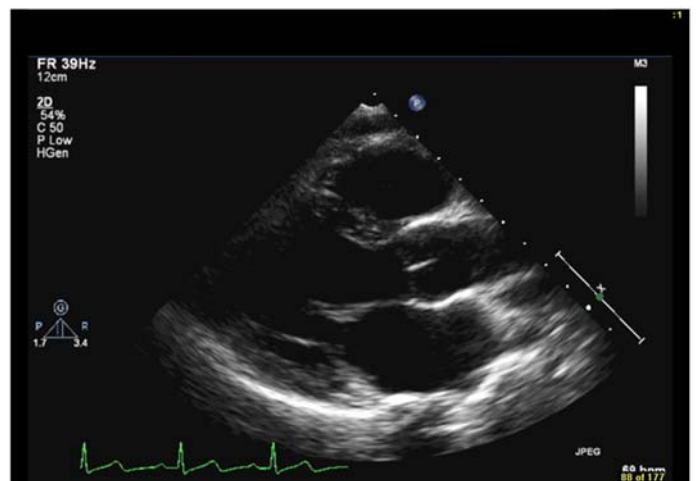

Figure 3. Parasternal long axis (PLAX)

- Minimized angle between ascending aorta and left ventricle;
- maximized width view of left ventricle;
- maximal opening of mitral valve (showing both anterior and posterior mitral valve leaflets, right- and noncoronary cusps of aortic valve);
- no papillary muscle in view.

The PLAX view is the primary view used to measure the left ventricular outflow tract (LVOT). An image will be saved for validation.

#### *Parasternal short axis (PSAX)*

This view will only be obtained in case the PLAX view does not provide a clear image of the LVOT. The PSAX view can be obtained on several levels. For study purposes it will be measured on the aortic, tricuspid and pulmonic valve level (figure 4). An image will be saved for validation.

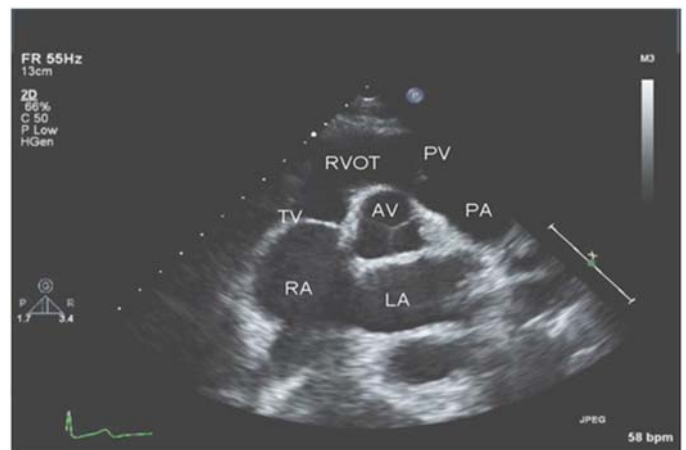

Figure 4. Parasternal short axis (PSAX)

#### *Apical four and five chamber view (AP4CH and AP5CH)*

The apical echographic window is located at the apex of the left ventricle (apical impulse).

Criteria of quality for a good view (figure 5, 6):

- Maximized view of endocardial border;
- Frames per second > 40;
- the entire endocardium is within scan sector in *both end-diastole and end-systole*;
- avoid apical foreshortening.

From the four chamber view the probe will be tilted caudally to obtain the apical five chamber view. In the apical five chamber view the velocity

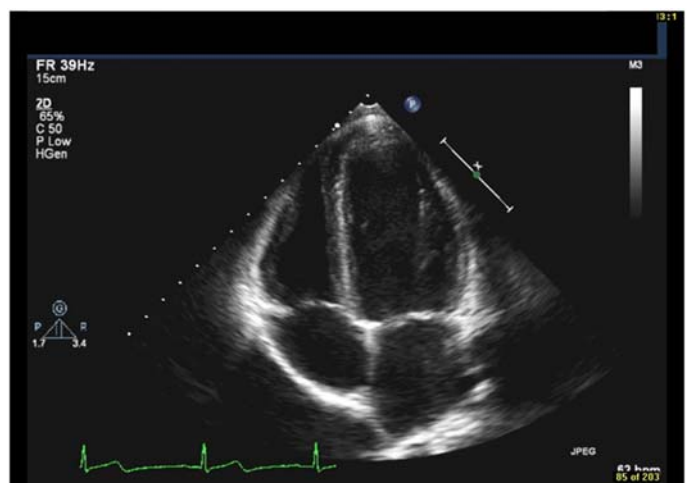

Figure 5. Apical four chamber view (AP4CH)

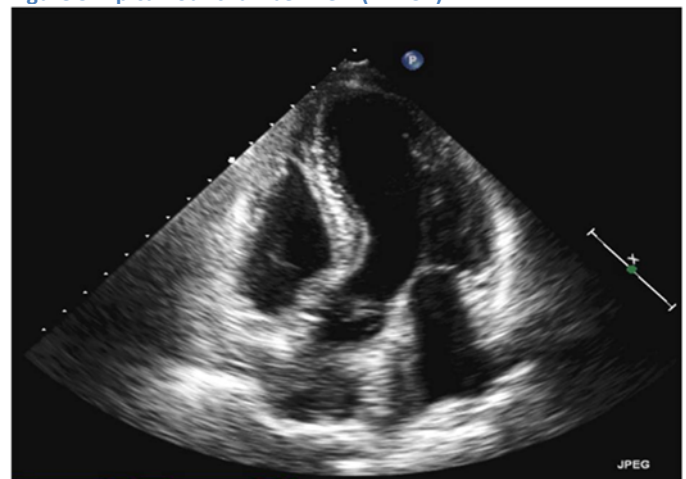

Figure 6. Apical five chamber view (AP5CH)



time integral will be measured using the pulse wave Doppler signal from the LVOT. Of both views an image will be saved for validation.

*Measuring the left ventricular outflow tract (LVOT) and the velocity time integral (VTI)*

The LVOT diameter changes very little through systole and diastole and is assumed to be constant and closely approximating a circle in shape. The LVOT diameter will be measured in 2D in the parasternal long axis view in systole (figure 7). If a clear image cannot be obtained through this view, the LVOT will be measured in the parasternal short axis or the AP5CH view.

The LVOT velocity time integral (LVOT-VTI) provides information regarding blood flow velocity across the time period of systole and is in the units of cm. Typical values are close to 2 cm. Blood flow velocity will be measured just above the aortic valve in the apical five chamber view by using pulse wave Doppler. The velocity time integral will be traced out on the ultrasound machine (figure 7). In case of an irregular rhythm such as atrial fibrillation, the average VTI of several beats will be used. Images of both measures will be saved for validation.

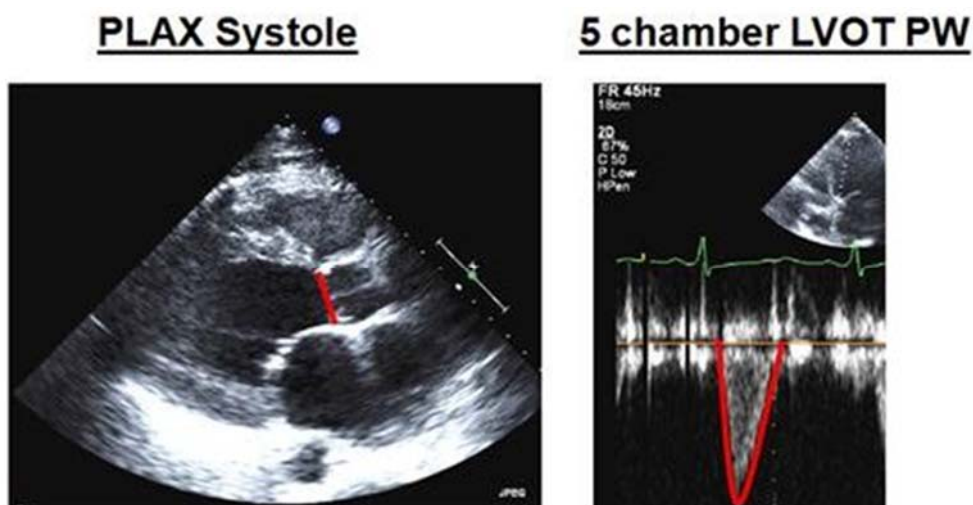

Figure 7. Left: the left ventricular outflow tract (LVOT). Right: the velocity time integral (VTI).

*Calculating cardiac output and cardiac index*

Cardiac output will be automatically calculated on the ultrasound machine after measuring the LVOT, VTI and heart rate. Cardiac index will be automatically derived using patient length and weight.

### *Measuring the tricuspid annular plane systolic excursion (TAPSE)*

TAPSE is assessed in M-mode, after placing the cursor on the junction of the tricuspid valve and the RV free wall in the AP4CH view. The distance of tricuspid annular movement between end-diastole and end-systole in millimeters is measured.

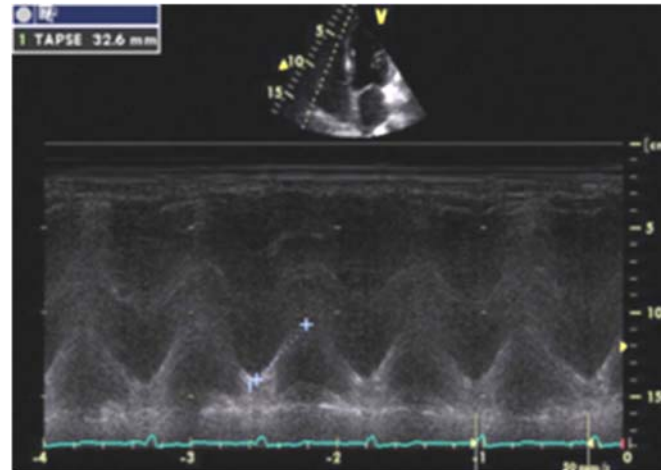

**Figure 8.** Assessment of TAPSE using the M-mode view

### *Measuring the systolic excursion velocity (RV S')*

RV S' was also assessed in the AP4CH view, with a tissue velocity imaging mode highlighting the area of interest. The pulsed Doppler sample volume was placed at the tricuspid level of the RV free wall and the longitudinal velocity of excursion was measured. An image quality with at least 150 frames per second is required for reliable measurements. This can be obtained by narrowing the echocardiography window and depth of the probe. Optimal image orientation must be ensured in order to avoid underestimating velocities.

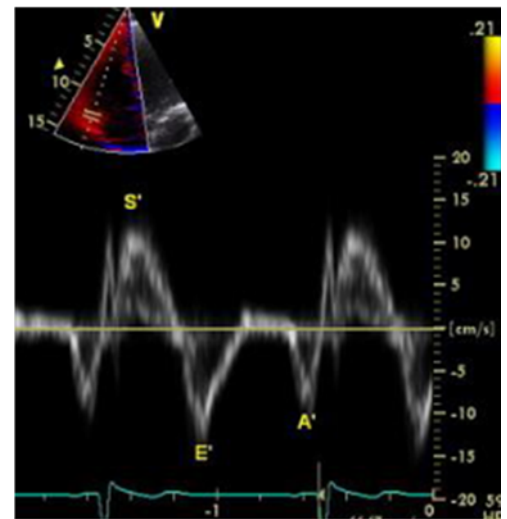

**Figure 9.** Assessment of the RV S' using the pulsed Doppler sample volume in the tissue velocity imaging mode

### *Data management*

The echocardiographic images will be saved on the internal hard disk of the echo Doppler machine. This is required for later validation. The images can be used for patient management as soon as data collection or the obtained images have been supervised by a cardiologist. After the measurements the measurements will be entered in the data management system (OpenClinica). For validation, a USB drive or external harddisk will be used to transfer images to the echolaboratory technician (corelab) for external validation and anonymization. The anonymized images and measurements will be stored on the central secure server of our department.

## Appendix 4: NIRS-protocol

### General outline

Peripheral tissue saturation (StO<sub>2</sub>) will be measured using a Near-infrared Spectroscopy (NIRS) device, the InSpectra™ tissue oxygenation monitor, model 650 (Hutchinson Technology, Inc., Hutchinson, MN). This is a non-invasive easy-to-use instrument. No additional training for researchers is necessary.

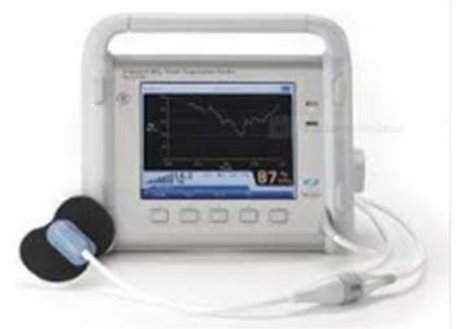

**Figure 10.** The InSpectra™ tissue oxygenation monitor

### Procedure

NIRS will be measured during physical examination. No specific patient position is required. After a signal has been obtained, 1 minute of stabilization must precede a 30 second recording of the StO<sub>2</sub>. A steady signal should not fluctuate more than 5% during the measurement. If more deviations occur, the probe position and stability will be checked and a new measurement recorded.

The order of measurements will be:

1. Thenar (15 mm probe, left)
2. Knee (15 mm probe, right)

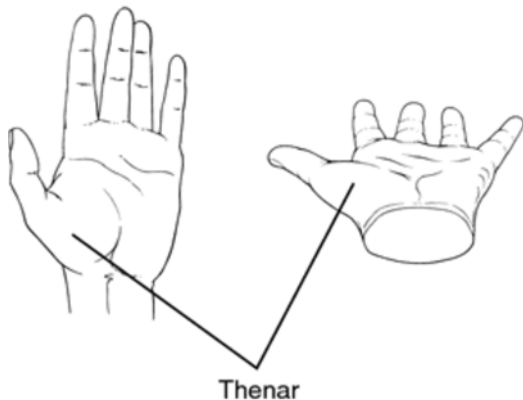

**Figure 11A.** The thenar region used for NIRS.

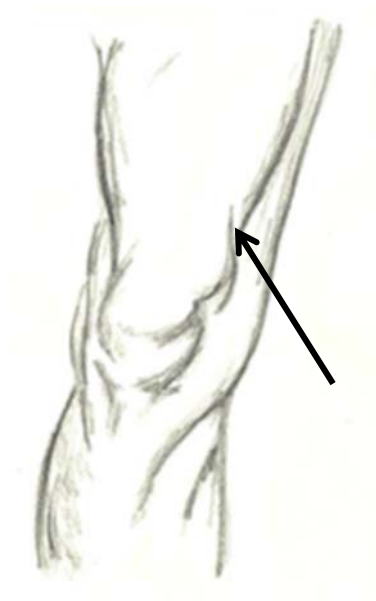

**Figure 11B.** Insertion of vastus medialis muscle (arrow) for NIRS

## Appendix 4: Pulmonary ultrasound

### General outline

The lungs will be imaged using pulmonary ultrasound. Similar to the transthoracic echocardiography training, researchers will receive a short session on how to obtain accurate pulmonary images. They will learn how to obtain pulmonary ultrasound images on six predefined points.

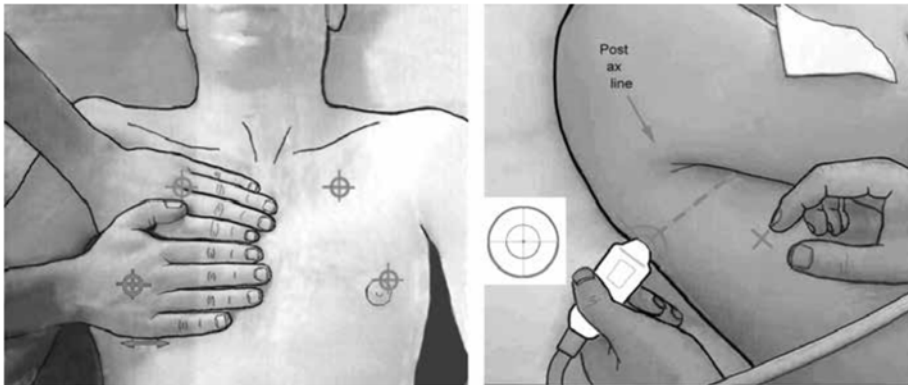

**Figure 12.** Left: the four BLUE-points. Right: the FALLS points.

### Procedure

Upon finishing the transthoracic echocardiographic exam (appendix 2), pulmonary ultrasound will be performed subsequently with the same mobile ultrasonic machine (General Electric Vivid-S6) and cardiac probe (M3S or M4S). Default cardiac imaging settings were used combined with the maximal frequency setting (3.6 MHz). Patients will be investigated in the supine position. Images from each view are saved and stored on a secured UMCG server.

### Views and images

Longitudinal scans were obtained from the intercostal space of each of the six BLUE points (figure 3) (25):

- Superior anterior midclavicular (bilateral)
- Inferior anterior midclavicular (bilateral)
- Lateral-inferior or mid-axial (bilateral)

The intercostal space was located when the shadows of the upper rib and lower rib enclosed the pleural line (called the 'bat sign'). After localization of the bat sign, we checked for horizontal lines (A lines) arising from the pleural line

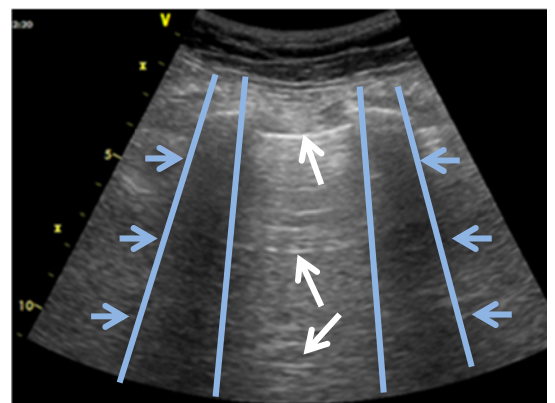

**Figure 13.** The bat sign (white arrows) and the horizontal A-lines (blue arrows)

repeating at regular intervals with a distance equal to that between the skin and the pleural line. A lines are indicative of normal lung surface. In addition, we sought vertical lines (B lines) obliterating the A lines. These lines arise from the pleural line, are hyperechoic, well defined and spread up to the lower edge of the screen. This phenomenon reflects the coexistence of elements with a major acoustic impedance gradient, i.e., fluid and air. The number of B lines in a single view was noted for each BLUE-point.

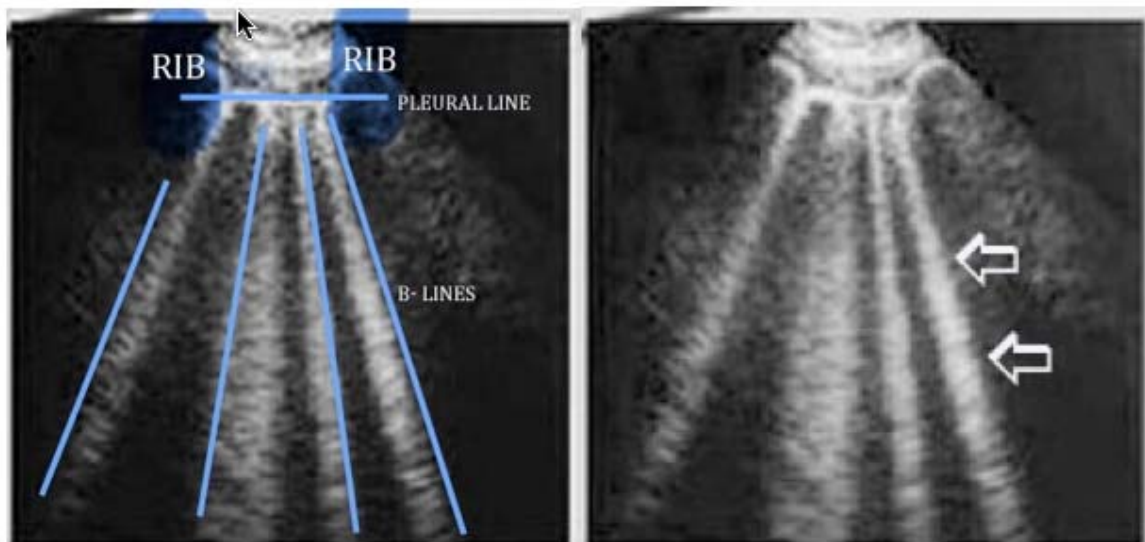

**Figure 14.** *Left: B-lines indicated by blue stripes. Right: B-lines indicated by white arrows*

#### *Measuring B-lines and determining a B profile*

Per view, the presence of B lines in three different interlobular septae is indicative of interstitial lung edema. This is objectified with ultrasound when three or more B lines with an intervening distance of at least 7 mm per scan are present, because thickened interlobular septae are typically 7 mm apart (25). When all the four anterior sites show three or more B lines this is called the B profile. This profile indicates diffuse alveolar interstitial edema. If three of the four sites show three or more B lines (technically three-quarters of a B-profile) this examination was also scored as B profile. Two-quarters of a B profile at the lower BLUE points are found in 5% cases of hemodynamic pulmonary edema and can therefore be considered as a B profile. For our purposes of using lung ultrasound for assessment of filling status we converted the number of B lines per site to 'presence' or 'absence' of B profile.

## Appendix 5: Inclusion procedure (Dutch)

### Screening op nieuwe patiënten

- 's Ochtends worden de nieuwe opnames op de algemene ICV overdracht van 08:30 besproken;
- de research verpleegkundigen maken dagelijks een overzicht van de nieuw opgenomen patiënten van die ochtend;
- update het research overzicht zelf 's middags met behulp van Poliplus data.

### Inclusie

Acuut opgenomen patiënten, die zijn gescreend volgens bovenstaand schema en die voldoen aan de inclusiecriteria, worden binnen 24 uur na opname op de IC geïncludeerd. Het beste moment om te includeren is 's ochtends van **10:00 tot 12:00 uur** en 's middags **vanaf 16:00 a 17:00 uur**. Voor 10:00 is de visite en wordt de patiënt gewassen door de verpleging. Van 12:00 tot 16:00 is bezoeken. Na 16:00 is de patiënt vaak weer beschikbaar. Consent wordt verkregen van de patiënt zelf; als deze niet aanspreekbaar is, wordt consent in de eerste instantie van naasten verkregen en vervolgens van de patiënt.

### Data invoer

Data wordt ingevoerd in OpenClinica, een online database die alleen vanaf de ICV server bereikbaar is. In de tutorial hieronder wordt beschreven hoe je een patiënt toevoegt en koppelt aan een meetmoment.

### Database

Alle bestanden die worden geüpload in OpenClinica komen terecht in **dezelfde** map. Om deze reden moeten ze systematisch genummerd worden. Hieronder staat een kort overzicht van de naamgeving. Zie ook onder 17 datamanagement.

| Onderdeel        | Naam                              |
|------------------|-----------------------------------|
| Echo beelden     | SICS1_0001_01_LVOT                |
|                  | SICS1_0001_01_VTI                 |
|                  | etc                               |
| Informed consent | SICS1_0001_Consent family/patient |

ECG SICS1\_0001\_01\_ECG  
 X-thorax SICS1\_0001\_01\_Xthorax

## OpenClinica

### 1. Inloggen

Gebruik je UMCG username en password.

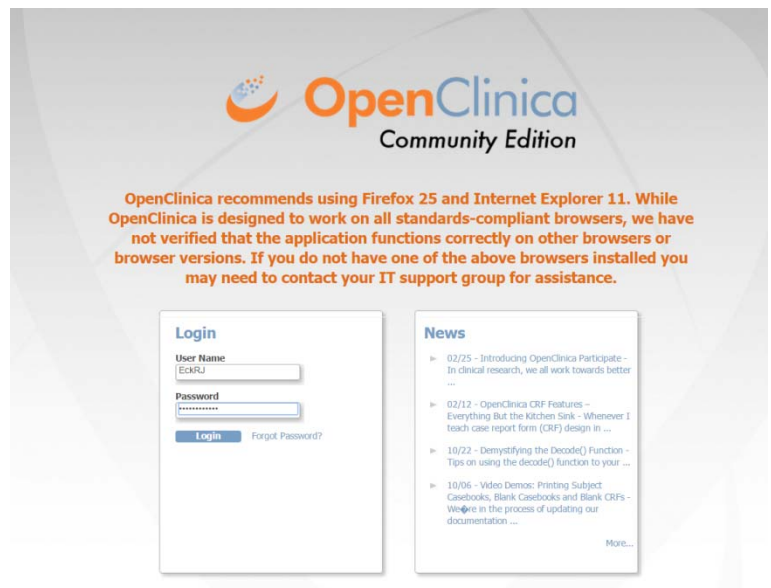

### 2. Hoofdscherm

Hier zie je een overzicht van de 'subject matrix', oftewel je geïnludeerde patiënten.

**Subject Matrix for SICS-I**

Navigation: 15 | Show More | Select An Event | Add New Subject

| Study Subject ID | Admittance | 3-days | 90-days | Informed consent | Excluded | Actions |
|------------------|------------|--------|---------|------------------|----------|---------|
| SICS1_0001       |            |        |         |                  |          |         |
| SICS1_0002       |            |        |         |                  |          |         |
| SICS1_0003       |            |        |         |                  |          |         |
| SICS1_0004       |            |        |         |                  |          |         |
| SICS1_0005       |            |        |         |                  |          |         |
| SICS1_0006       |            |        |         |                  |          |         |
| SICS1_0007       |            |        |         |                  |          |         |

Results 1 - 7 of 7.

### 3. Patiënten toevoegen (1)

Klik op 'tasks' en vervolgens op 'add subject'.

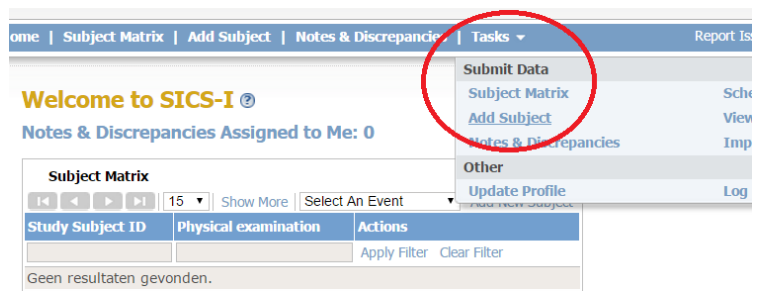



#### 4. Patiënten toevoegen (2)

- *Study subject ID*: patiënt coderingsnummer (zie ook 17: Data management)
- *Person ID*: UMCG nummer
- *Secondary ID*: niet invullen
- Date of enrollment: huidige datum
- Sex: geslacht
- *Date of birth*: geboortedatum
- Als je alles hebt ingevuld: klik op "save and assign study event"

**SICS-I: Add Subject**

\* indicates required field.

Study Subject ID: 123456789 \*

Person ID: 123456789 \*

Secondary ID

Date of Enrollment for Study 'SICS-I': 05-Mar-2015 \*

Sex: Male \*

Date of Birth: 10-Jan-1990 \*

Save and Assign Study Event Save and Add Next Subject Save and Finish Cancel

Workflow

Add New Subject → Add Study Event

#### 5. Een patiënt aan een 'Study Event' toevoegen

- OpenClinica noemt het moment binnen de studie waarop data wordt verzameld een 'Study Event'. De SICS-I studie heeft 5 evens: admittance, 3-days, 90-days, informed consent en excluded. Hieronder volgt meer uitleg over de momenten:

**Schedule Study Event for 123456789**

\* indicates required field.

Study Subject ID: 123456789

Study Event Definition: -Select- \*

Start Date/Time: Admittance (Non-repeating) (DD-MMM-YYYY HH:MM) \*

End Date/Time: 3-days (Non-repeating) (DD-MMM-YYYY HH:MM) \*

90-days (Non-repeating)

Not included (Non-repeating)

Informed consent (Non-repeating)

☐ Schedule Another Event: (optional)

Proceed to Enter Data Cancel

- Als een patiënt wordt geïnccludeerd, dan wordt uiteindelijk ingevuld:

1. Admittance: hier worden data van lichamelijk onderzoek en echografie ingevoerd.
2. 3-days: hier worden (binnen 72 uur) patiëntdata uit Poliplus ingevoerd. Dit zijn bloedwaarden, ECG's, etc.
3. 90-days: hier worden (na 90 dagen) mortaliteit en Mediscore data ingevoerd.
4. Informed consent: hier wordt het informed consent formulier geüpload.

- Als een patiënt niet wordt geïncludeerd, dan wordt alleen ingevuld:

1. Excluded: als een patient gescreend wordt en voldoet aan exclusiecriteria, of voldoet aan inclusiecriteria, maar niet wordt geïncludeerd (bijvoorbeeld om logistieke redenen).

- 'Start Date/Time' en 'End Date/Time' kunnen leeg blijven.

## 6. Data invoeren (1)

- Nadat je een event gekozen hebt, kan je hiervoor data invullen in het 'Case Report Form (CRF)'.
- Hiernaast is het event 'Admittance' gekozen. Het versienummer kan verschillen.
- Onder 'CRF name' staat de bijbehorende CRF. Klik onder actions op de knop 'enter data' (kleine rode cirkel) om data in te voeren.

## 7. Data invoeren (2)

Als je een CRF opent verschijnt het scherm hiernaast: je ziet de 'CRF Header Info' en de CRF zelf. Een korte toelichting:

- Study subject ID
- Vul hier jouw naam in
- Vul hier de huidige datum in
- Algemene invulinstructies; let hierop bij het invullen
- Als je de pagina hebt ingevuld, klik op 'save'

6. De CRF bestaat uit meerdere tabbladen (je ziet er hiernaast al 3). Klik hier om snel van het ene naar het andere tabblad te gaan.

8. Data invoeren (3)

Als data niet verzameld werd: vul dan '-9999' in. Klik op het vlaggetje om een verklaring te geven voor de missing value. Als er geen data verzameld kon worden (patiënt heeft bijvoorbeeld steunkousen): vul dan '-8888' in. Geef wederom een verklaring.

9. Data invoeren (4)

Als de data is ingevoerd en je niets meer hoeft toe te voegen, klik dan op 'Mark CRF Complete'. Vanaf dat moment kun je geen aanpassingen meer maken, doe dit dus pas als de CRF echt compleet is ingevuld!

Your data has been saved. You can continue entering/editing data now or return at a later time.

10. Nieuwe meetmomenten toevoegen

Om data voor een volgend meetmoment toe te voegen, ga je naar de subject matrix.

Protocol\_SICS-I Version 20161108

Subject Matrix for SICS-I

| Study Subject ID | Admittance | 3-days | 90-days | Informed consent | Excluded | Actions              |
|------------------|------------|--------|---------|------------------|----------|----------------------|
| SICS1_0001       | [icon]     | [icon] | [icon]  | [icon]           | [icon]   | [icon] [icon] [icon] |
| SICS1_0002       | [icon]     | [icon] | [icon]  | [icon]           | [icon]   | [icon] [icon] [icon] |
| SICS1_0003       | [icon]     | [icon] | [icon]  | [icon]           | [icon]   | [icon] [icon] [icon] |
| SICS1_0004       | [icon]     | [icon] | [icon]  | [icon]           | [icon]   | [icon] [icon] [icon] |
| SICS1_0005       | [icon]     | [icon] | [icon]  | [icon]           | [icon]   | [icon] [icon] [icon] |
| SICS1_0006       | [icon]     | [icon] | [icon]  | [icon]           | [icon]   | [icon] [icon] [icon] |
| SICS1_0007       | [icon]     | [icon] | [icon]  | [icon]           | [icon]   | [icon] [icon] [icon] |

Results 1 - 7 of 7.

Klik op het icoontje van het meetmoment dat je wilt toevoegen. In het voorbeeld hiernaast wil je voor de patiënt met study subject ID 'SICS1\_0002' data toevoegen in meetmoment '3-days'. Doe dit door te klikken op schedule en vervolgens het stappenplan vanaf 5 te herhalen.

**[20] References**

- (1) Gaudard P, Mourad M, Eliet J, Zeroual N, Culas G, Rouviere P, et al. Management and outcome of patients supported with Impella 5.0 for refractory cardiogenic shock. *Crit Care* 2015 Oct 9;19:363-015-1073-8.
- (2) Martin C, Papazian L, Perrin G, Saux P, Gouin F. Norepinephrine or dopamine for the treatment of hyperdynamic septic shock? *Chest* 1993 Jun;103(6):1826-1831.
- (3) Thorlund K, Imberger G, Walsh M, Chu R, Gluud C, Wetterslev J, et al. The number of patients and events required to limit the risk of overestimation of intervention effects in meta-analysis--a simulation study. *PLoS One* 2011;6(10):e25491.
- (4) Rajaram SS, Desai NK, Kalra A, Gajera M, Cavanaugh SK, Brampton W, et al. Pulmonary artery catheters for adult patients in intensive care. *Cochrane Database Syst Rev* 2013 Feb 28;(2):CD003408. doi(2):CD003408.
- (5) Yavuz S, Ayabakan N, Goncu MT, Ozdemir IA. Effect of combined dopamine and diltiazem on renal function after cardiac surgery. *Med Sci Monit* 2002 May;8(5):PI45-50.
- (6) Patel GP, Grahe JS, Sperry M, Singla S, Elpern E, Lateef O, et al. Efficacy and safety of dopamine versus norepinephrine in the management of septic shock. *Shock* 2010 Apr;33(4):375-380.
- (7) Copenhagen Trial Unit. TSA—Trial Sequential Analysis. 2011; Available at: <http://ctu.dk/tsa/>.
- (8) Johansson SG, Bieber T, Dahl R, Friedmann PS, Lanier BQ, Lockey RF, et al. Revised nomenclature for allergy for global use: Report of the Nomenclature Review Committee of the World Allergy Organization, October 2003. *J Allergy Clin Immunol* 2004 May;113(5):832-836.
- (9) Dellinger RP, Levy MM, Rhodes A, Annane D, Gerlach H, Opal SM, et al. Surviving Sepsis Campaign: international guidelines for management of severe sepsis and septic shock, 2012. *Intensive Care Med* 2013 Feb;39(2):165-228.
- (10) Koster G, Wetterslev J, Gluud C, Zijlstra JG, Scheeren TW, van der Horst IC, et al. Effects of levosimendan for low cardiac output syndrome in critically ill patients: systematic review with meta-analysis and trial sequential analysis. *Intensive Care Med* 2015 Feb;41(2):203-221.
- (11) Salminen PR, Dahle GO, Moen CA, Wergeland A, Jonassen AK, Haaverstad R, et al. Reperfusion therapy with low-dose insulin or insulin-like growth factor 2; myocardial function and infarct size in a porcine model of ischaemia and reperfusion. *Basic Clin Pharmacol Toxicol* 2014 Nov;115(5):438-447.
- (12) van der Horst IC, Timmer JR, Ottervanger JP, Bilo HJ, Miedema K, Gans RO, et al. Glucose and potassium derangements by glucose-insulin-potassium infusion in acute myocardial infarction. *Neth Heart J* 2006 Mar;14(3):89-94.
- (13) Brok J, Thorlund K, Wetterslev J, Gluud C. Apparently conclusive meta-analyses may be inconclusive--Trial sequential analysis adjustment of random error risk due to repetitive testing of accumulating data in apparently conclusive neonatal meta-analyses. *Int J Epidemiol* 2009 Feb;38(1):287-298.

(14) Thorlund K, Engstrom J, Wetterslev J, Brok J, Imberger G, Gluud C. User manual for Trial Sequential Analysis (TSA). 2011; Available at: [http://ctu.dk/tsa/files/tsa\\_manual.pdf](http://ctu.dk/tsa/files/tsa_manual.pdf).

(15) International Conference on Harmonisation Expert Working Group. International conference on harmonisation of technical requirements for registration of pharmaceuticals for human use, ed. ICH harmonised tripartite guideline; guideline for good clinical practice. Available at: [http://www.ich.org/fileadmin/Public Web Site/ICH Products/Guidelines/Efficacy/E6/E6 R1 Guideline.pdf](http://www.ich.org/fileadmin/Public%20Web%20Site/ICH_Products/Guidelines/Efficacy/E6/E6_R1_Guideline.pdf).

(16) Cove ME, MacLaren G. Clinical review: mechanical circulatory support for cardiogenic shock complicating acute myocardial infarction. *Crit Care* 2010;14(5):235.

(17) Aissaoui N, Puymirat E, Simon T, Bonnefoy-Cudraz E, Angoulvant D, Schiele F, et al. Long-term outcome in early survivors of cardiogenic shock at the acute stage of myocardial infarction: a landmark analysis from the French registry of Acute ST-elevation and non-ST-elevation Myocardial Infarction (FAST-MI) Registry. *Crit Care* 2014 Sep 19;18(5):516-014-0516-y.

(18) Sakr Y, Reinhart K, Vincent JL, Sprung CL, Moreno R, Ranieri VM, et al. Does dopamine administration in shock influence outcome? Results of the Sepsis Occurrence in Acutely Ill Patients (SOAP) Study. *Crit Care Med* 2006 Mar;34(3):589-597.

(19) Kosiborod M, Inzucchi SE, Krumholz HM, Masoudi FA, Goyal A, Xiao L, et al. Glucose normalization and outcomes in patients with acute myocardial infarction. *Arch Intern Med* 2009 Mar 9;169(5):438-446.

(20) Poss J, Kriechbaum S, Ewen S, Graf J, Hager I, Hennersdorf M, et al. First-in-man analysis of the icor assist device in patients with cardiogenic shock. *Eur Heart J Acute Cardiovasc Care* 2015 Oct;4(5):475-481.

(21) Oba Y, Lone NA. Mortality benefit of vasopressor and inotropic agents in septic shock: a Bayesian network meta-analysis of randomized controlled trials. *J Crit Care* 2014 Oct;29(5):706-710.

(22) Pova PR, Carneiro AH, Ribeiro OS, Pereira AC, Portuguese Community-Acquired Sepsis Study Group. Influence of vasopressor agent in septic shock mortality. Results from the Portuguese Community-Acquired Sepsis Study (SACiUCI study). *Crit Care Med* 2009 Feb;37(2):410-416.

(23) von Scheidt W, Pauschinger M, Ertl G. Long-term intravenous inotropes in low-output terminal heart failure? *Clin Res Cardiol* 2016 Jun;105(6):471-481.

(24) Diaz A, Humeres C, Gonzalez V, Gomez MT, Montt N, Sanchez G, et al. Insulin/NFkappaB protects against ischemia-induced necrotic cardiomyocyte death. *Biochem Biophys Res Commun* 2015 Nov 13;467(2):451-457.

(25) Lichtenstein DA, Meziere GA. Relevance of lung ultrasound in the diagnosis of acute respiratory failure: the BLUE protocol. *Chest* 2008 Jul;134(1):117-125.

(26) Geerts BF, Aarts LP, Groeneveld AB, Jansen JR. Predicting cardiac output responses to passive leg raising by a PEEP-induced increase in central venous pressure, in cardiac surgery patients. *Br J Anaesth* 2011 Aug;107(2):150-156.

- (27) Rudski LG, Lai WW, Afilalo J, Hua L, Handschumacher MD, Chandrasekaran K, et al. Guidelines for the echocardiographic assessment of the right heart in adults: a report from the American Society of Echocardiography endorsed by the European Association of Echocardiography, a registered branch of the European Society of Cardiology, and the Canadian Society of Echocardiography. *J Am Soc Echocardiogr* 2010 Jul;23(7):685-713; quiz 786-8.
- (28) Monnet X, Anguel N, Naudin B, Jabot J, Richard C, Teboul JL. Arterial pressure-based cardiac output in septic patients: different accuracy of pulse contour and uncalibrated pressure waveform devices. *Crit Care* 2010;14(3):R109.
- (29) Tejedor A, Rivas E, Rios J, Arismendi E, Martinez-Palli G, Delgado S, et al. Accuracy of Vigileo/Flotrac monitoring system in morbidly obese patients. *J Crit Care* 2015 Jun;30(3):562-566.
- (30) Valley TS, Sjoding MW, Goldberger ZD, Cooke CR. ICU Use and Quality of Care for Patients With Myocardial Infarction and Heart Failure. *Chest* 2016 Sep;150(3):524-532.
- (31) Champion HR, Sacco WJ, Hannan DS, Lepper RL, Atzinger ES, Copes WS, et al. Assessment of injury severity: the triage index. *Crit Care Med* 1980 Apr;8(4):201-208.
- (32) Bohadana A, Izbicki G, Kraman SS. Fundamentals of lung auscultation. *N Engl J Med* 2014 Feb 20;370(8):744-751.
- (33) Knaus WA, Draper EA, Wagner DP, Zimmerman JE. APACHE II: a severity of disease classification system. *Crit Care Med* 1985 Oct;13(10):818-829.
- (34) Le Gall JR, Lemeshow S, Saulnier F. A new Simplified Acute Physiology Score (SAPS II) based on a European/North American multicenter study. *JAMA* 1993 Dec 22-29;270(24):2957-2963.
- (35) Zimmerman JE, Kramer AA, McNair DS, Malila FM. Acute Physiology and Chronic Health Evaluation (APACHE) IV: hospital mortality assessment for today's critically ill patients. *Crit Care Med* 2006 May;34(5):1297-1310.
- (36) ARDS Definition Task Force, Ranieri VM, Rubenfeld GD, Thompson BT, Ferguson ND, Caldwell E, et al. Acute respiratory distress syndrome: the Berlin Definition. *JAMA* 2012 Jun 20;307(23):2526-2533.
